# Supplementary material for: Synthesis and characterization of NiAl-hydride heterometallics: perturbing electron density within Al–H–Ni subunits
Source: Royal Society of Chemistry journal article supplement (doi:10.1039/d4dt01786b), 2024-01-01
Supplement: d4dt01786b1.pdf [file d4dt01786b1.pdf]

Supplementary Information For:

# Synthesis and Characterization of NiAl-Hydride Heterometallics: Perturbing Electron Density Within Al–H–Ni Subunits

*Aleida G. Gonzalez<sup>1</sup>, Fernando Gonzalez<sup>1</sup>, Edgardo De Leon<sup>1</sup>, Kaitlyn M. Birkhoff<sup>2</sup>, Samantha Yruegas<sup>2</sup>, Haoyuan Chen<sup>\*3,4</sup>, and Manar M. Shoshani<sup>\*1,5</sup>*

1. School of Integrated Biological and Chemical Sciences, University of Texas Rio Grande Valley, Brownsville Texas, 78520, United States.
2. Department of Chemistry, Rice University, Houston, Texas, 77005, United States.
3. Department of Physics and Astronomy, University of Texas Rio Grande Valley, Edinburg Texas, 78539, United States.
4. Department of Chemistry, Southern Methodist University, Dallas, Texas, 75275, United States
5. Department of Chemistry, University of Kansas, Lawrence, Kansas, 66045, United States

Contents:

**S1: NMR spectra of Heterobimetallic Complexes**

**S2: VT NMR of Complexes 2-(PPh<sub>3</sub>)<sub>2</sub> and 2-(dppm)<sub>2</sub>**

**S3: Computational Studies**

**S4: Crystallographic Information**

**S5: IR Spectroscopy**

## S1: NMR spectra of Heterobimetallic Complexes

Figure S1-1:  $^1\text{H}$  NMR spectrum of **2**-( $\text{PPh}_3$ ) $_2$  in  $\text{C}_6\text{D}_6$

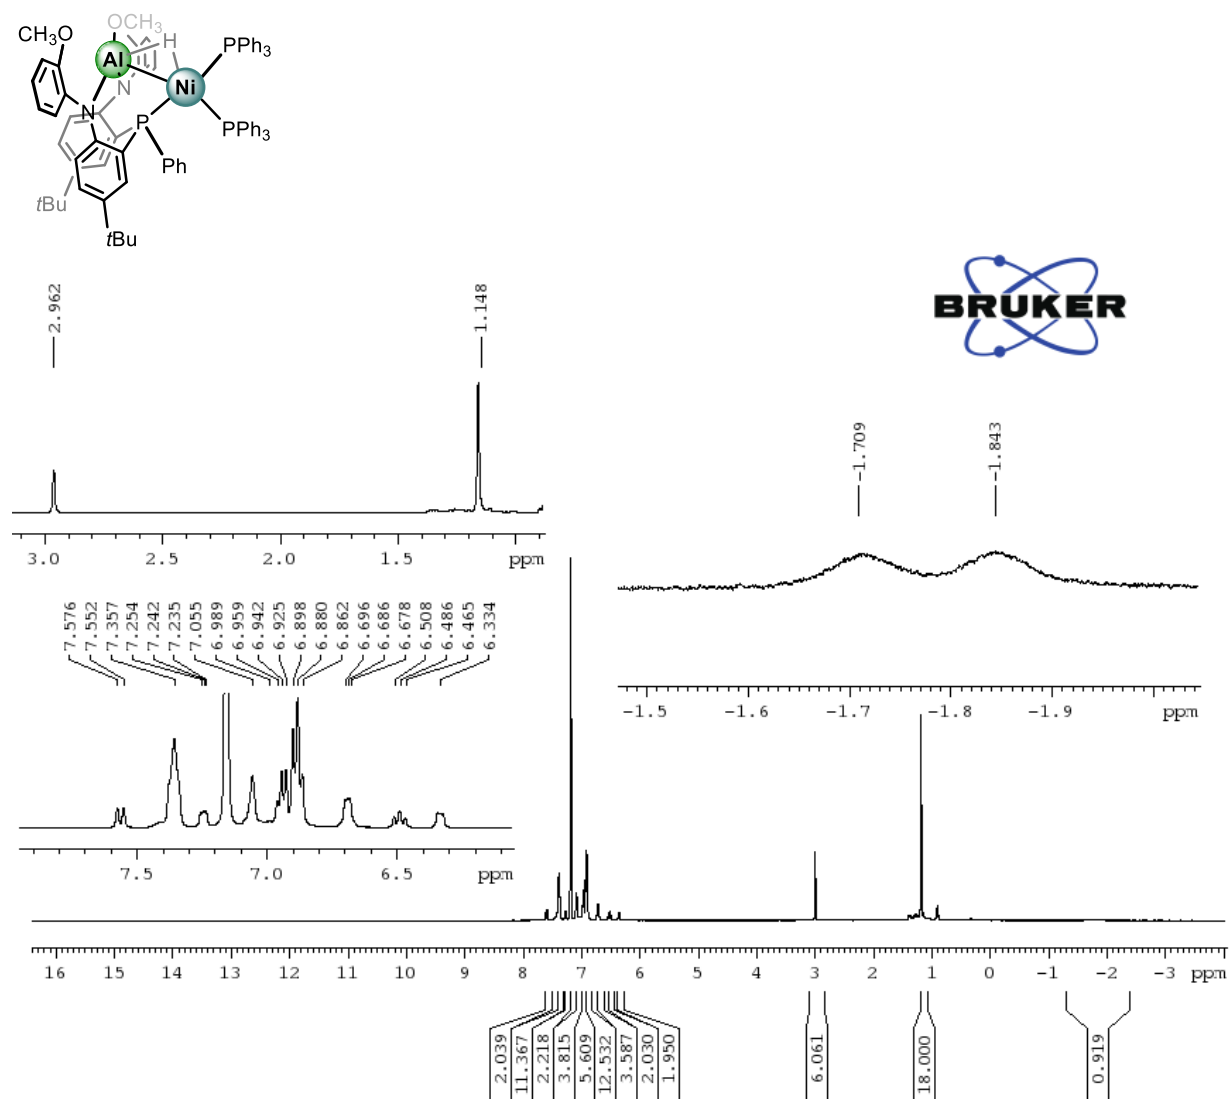

Figure S1-2:  $^{31}\text{P}\{^1\text{H}\}$  NMR spectrum of **2-(PPh<sub>3</sub>)<sub>2</sub>** in C<sub>6</sub>D<sub>6</sub>

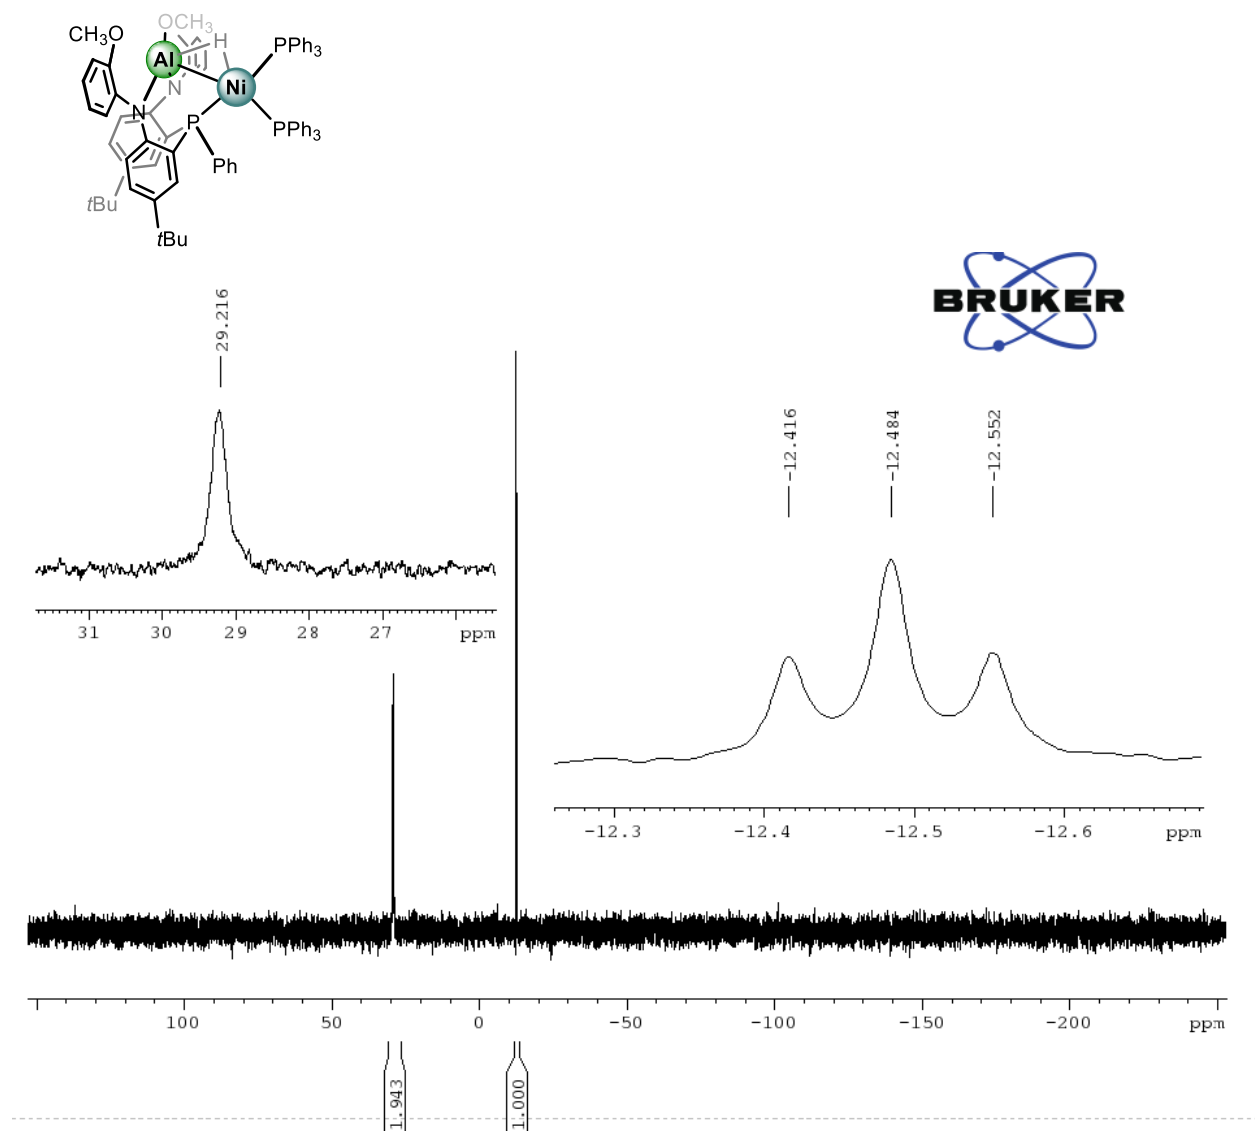

Figure S1-3:  $^{13}\text{C}\{^1\text{H}\}$  NMR spectrum of **2-(PPh<sub>3</sub>)<sub>2</sub>** in C<sub>6</sub>D<sub>6</sub>

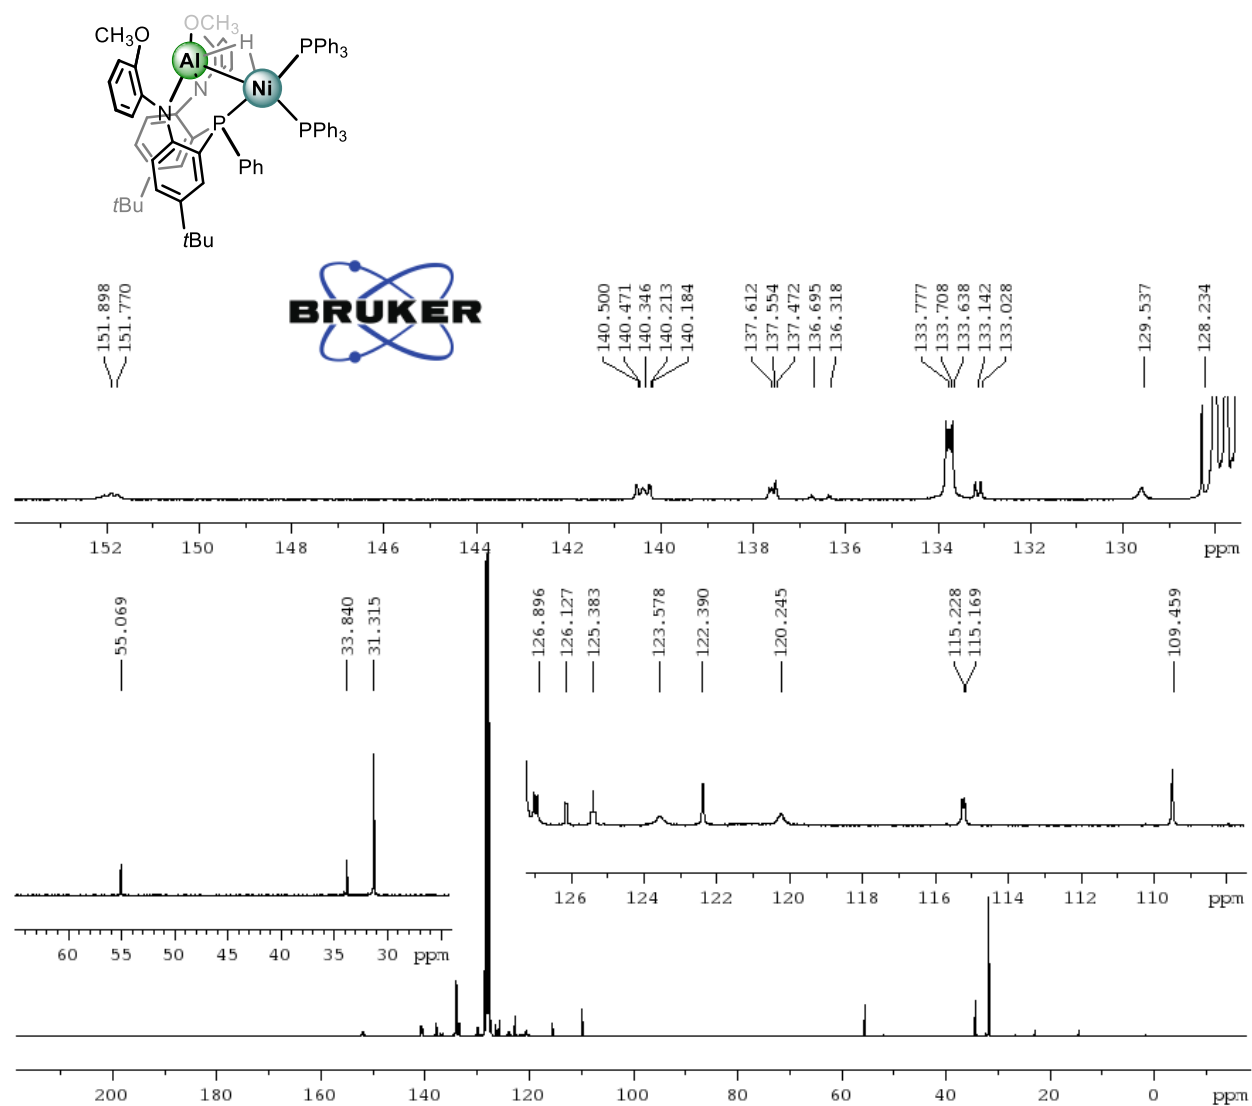

Figure S1-4:  $^1\text{H}$  NMR spectrum of **2-(dppm)<sub>2</sub>** in  $\text{C}_6\text{D}_6$

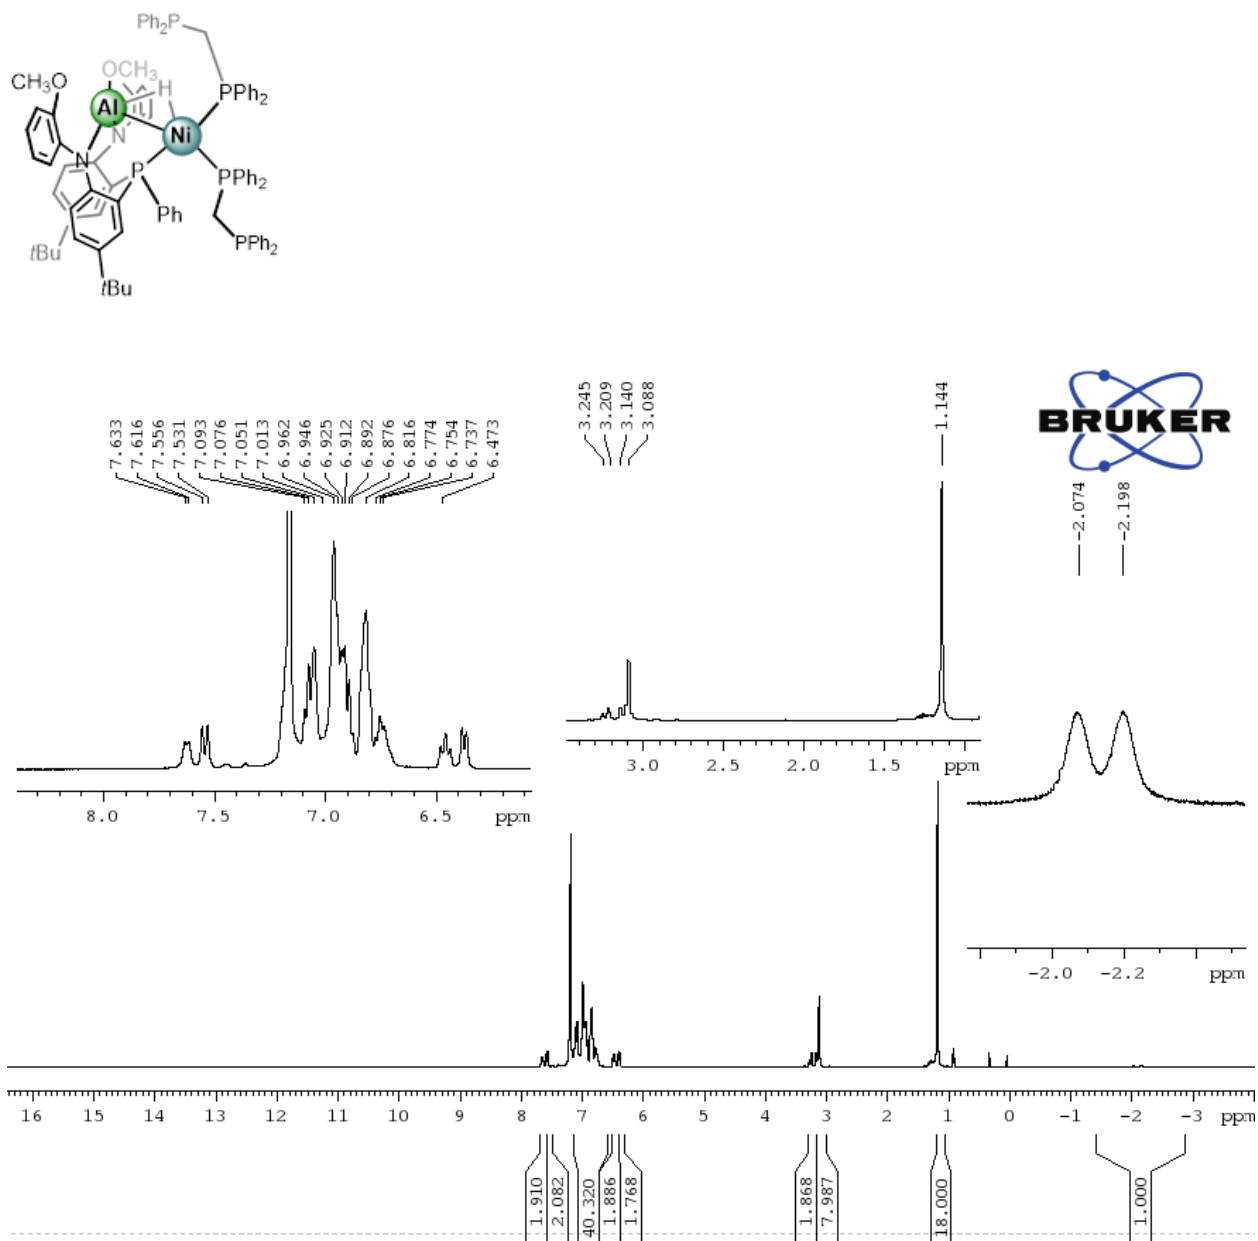

Figure S1-5:  $^{31}\text{P}\{^1\text{H}\}$  NMR spectrum of **2-(dppm)<sub>2</sub>** in  $\text{C}_6\text{D}_6$

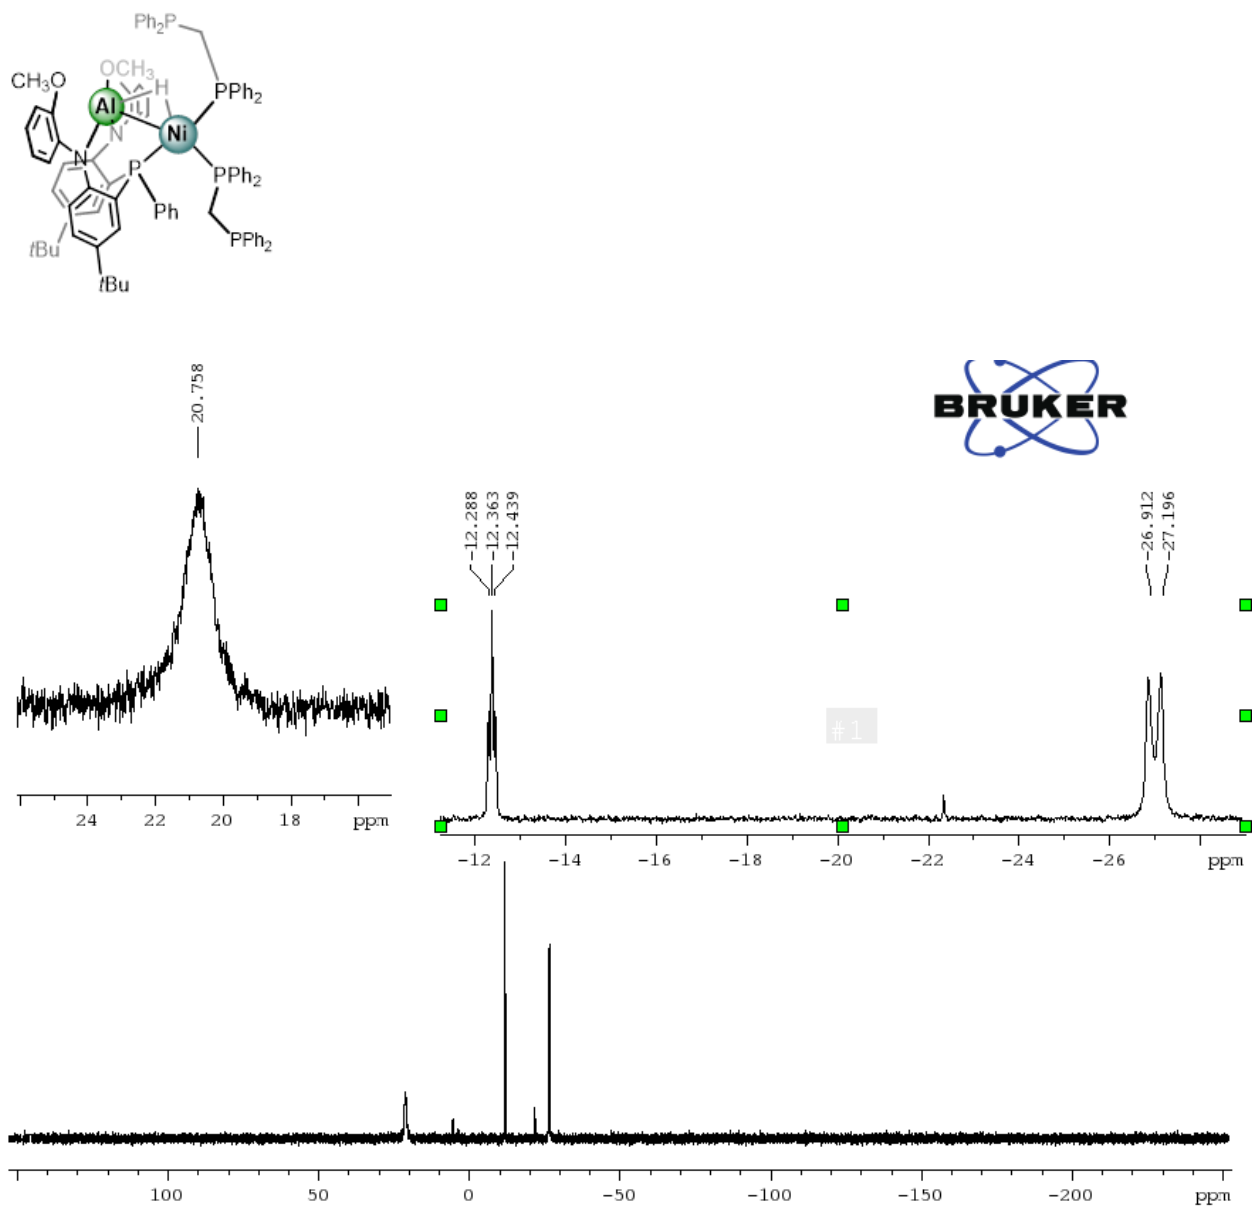

Figure S1-6:  $^{13}\text{C}\{^1\text{H}\}$  NMR spectrum of **2-(dppm)<sub>2</sub>** in  $\text{C}_6\text{D}_6$

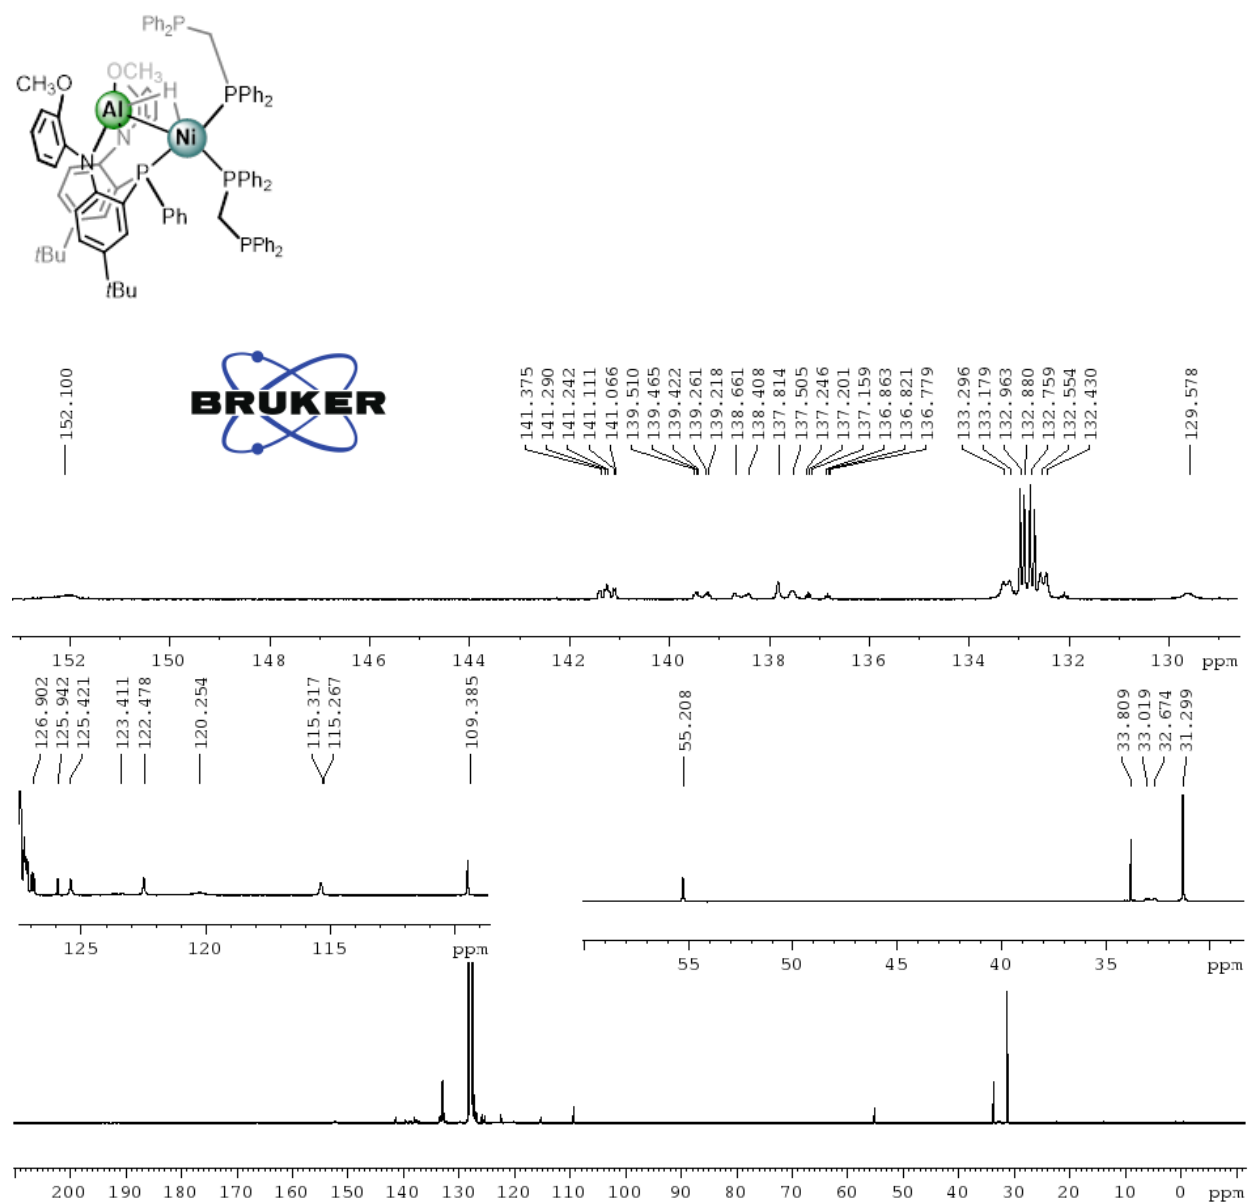

Figure S1-7:  $^1\text{H}$  NMR spectrum of **2-(PMe<sub>3</sub>)<sub>2</sub>** in C<sub>6</sub>D<sub>6</sub>

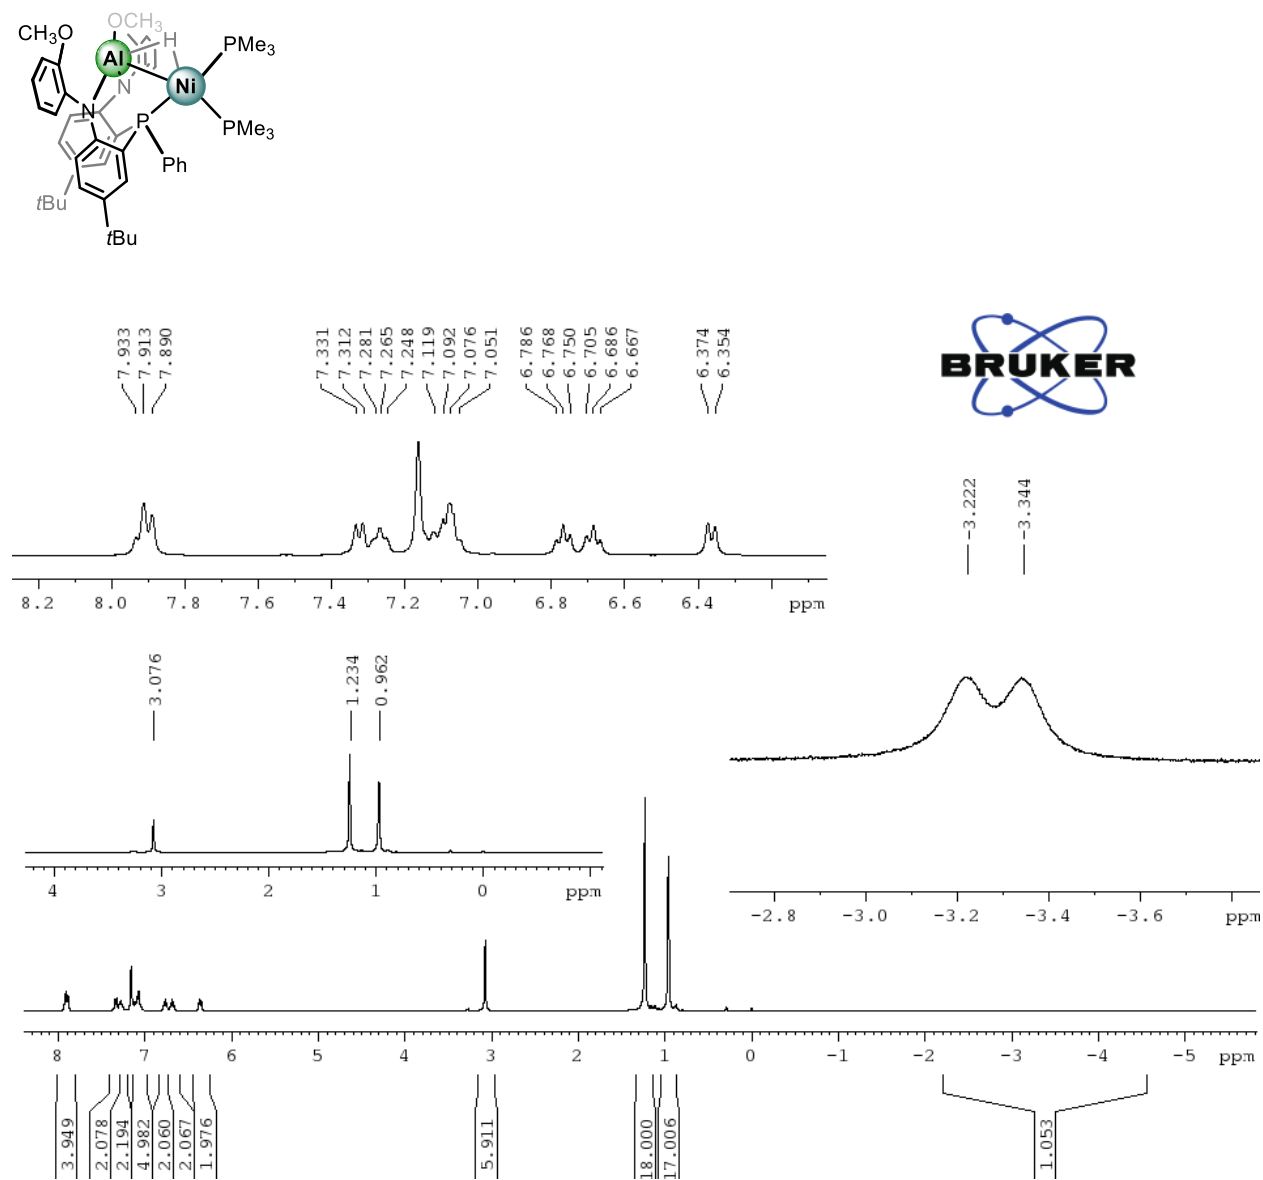



Figure S1-8:  $^{31}\text{P}\{^1\text{H}\}$  NMR spectrum of **2-(PMe<sub>3</sub>)<sub>2</sub>** in C<sub>6</sub>D<sub>6</sub>

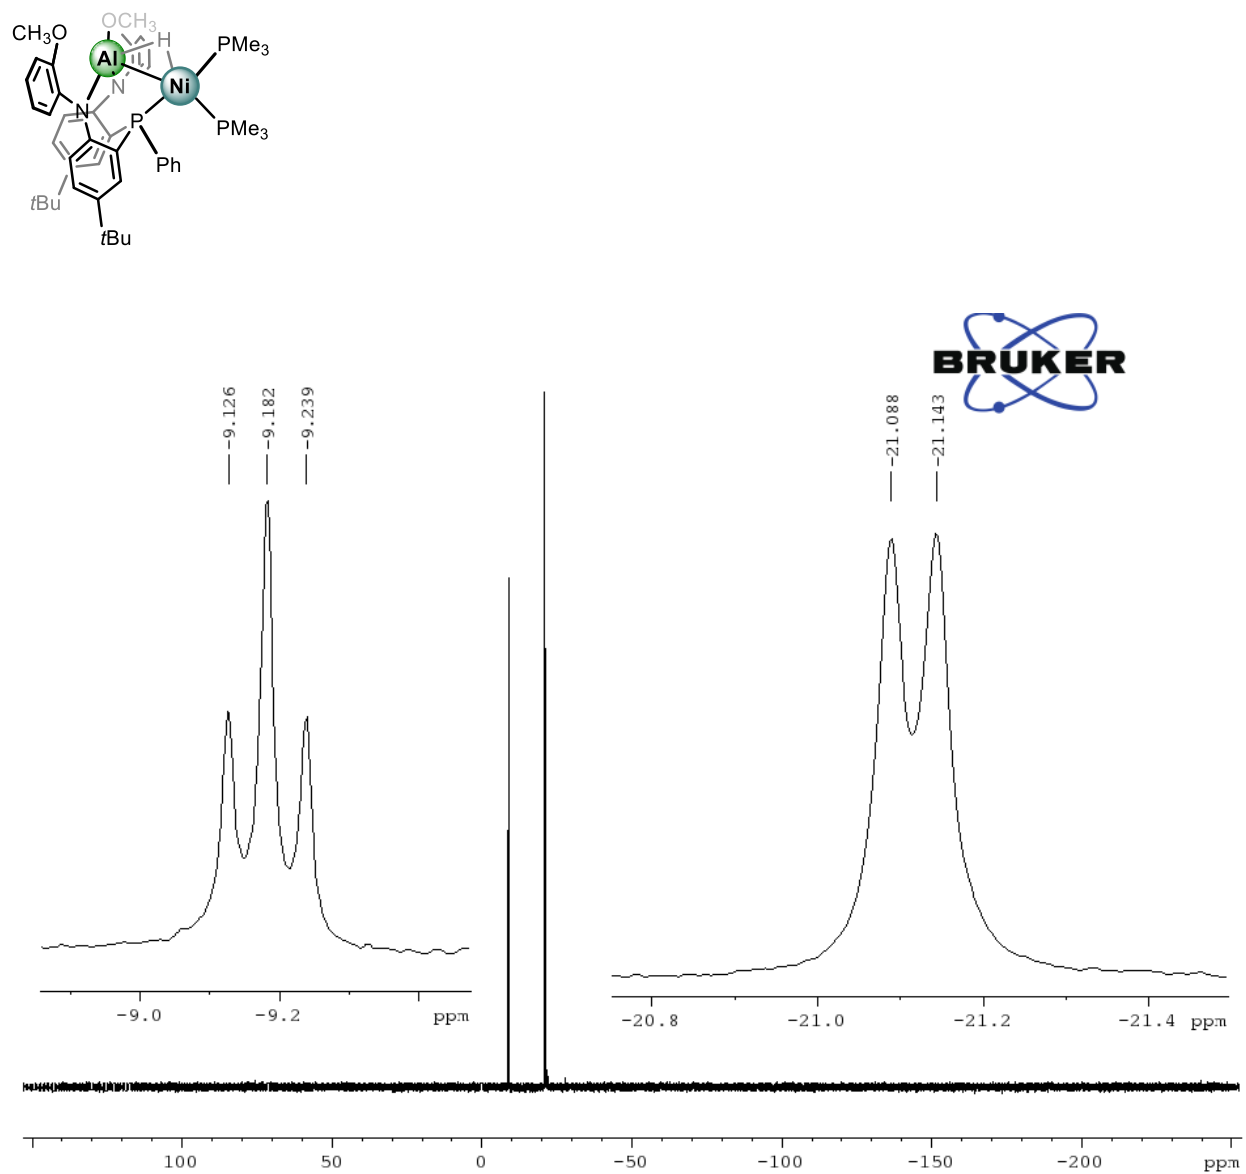

Figure S1-9:  $^{13}\text{C}\{^1\text{H}\}$  NMR spectrum of **2-(PMe<sub>3</sub>)<sub>2</sub>** in  $\text{C}_6\text{D}_6$

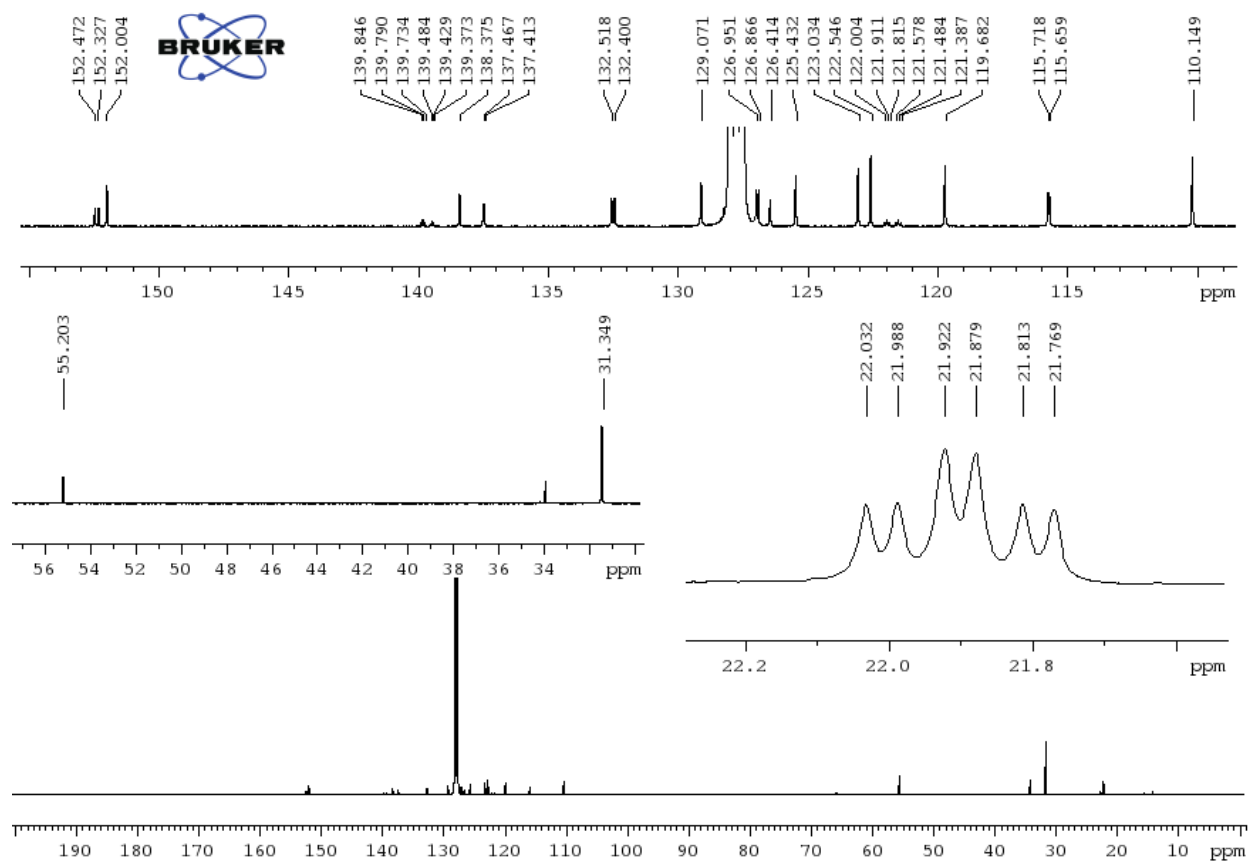

Figure S1-10:  $^1\text{H}$  NMR spectrum of **3** in  $\text{THF-D}_8$

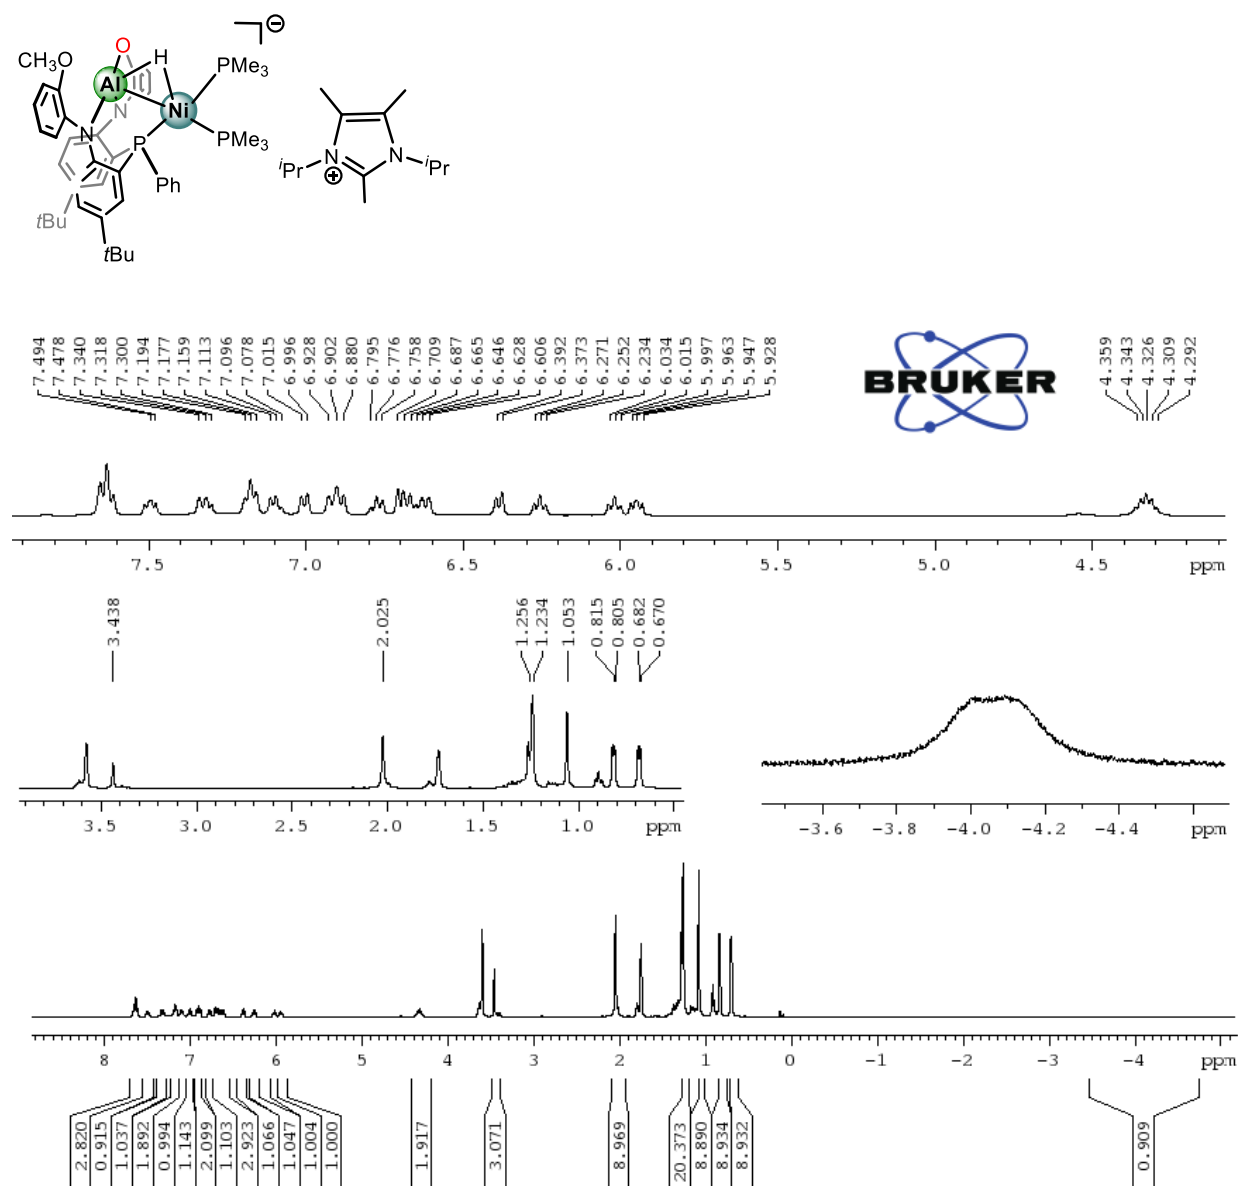

Figure S1-11:  $^{31}\text{P}\{^1\text{H}\}$  NMR spectrum of **3** in THF- $\text{D}_8$

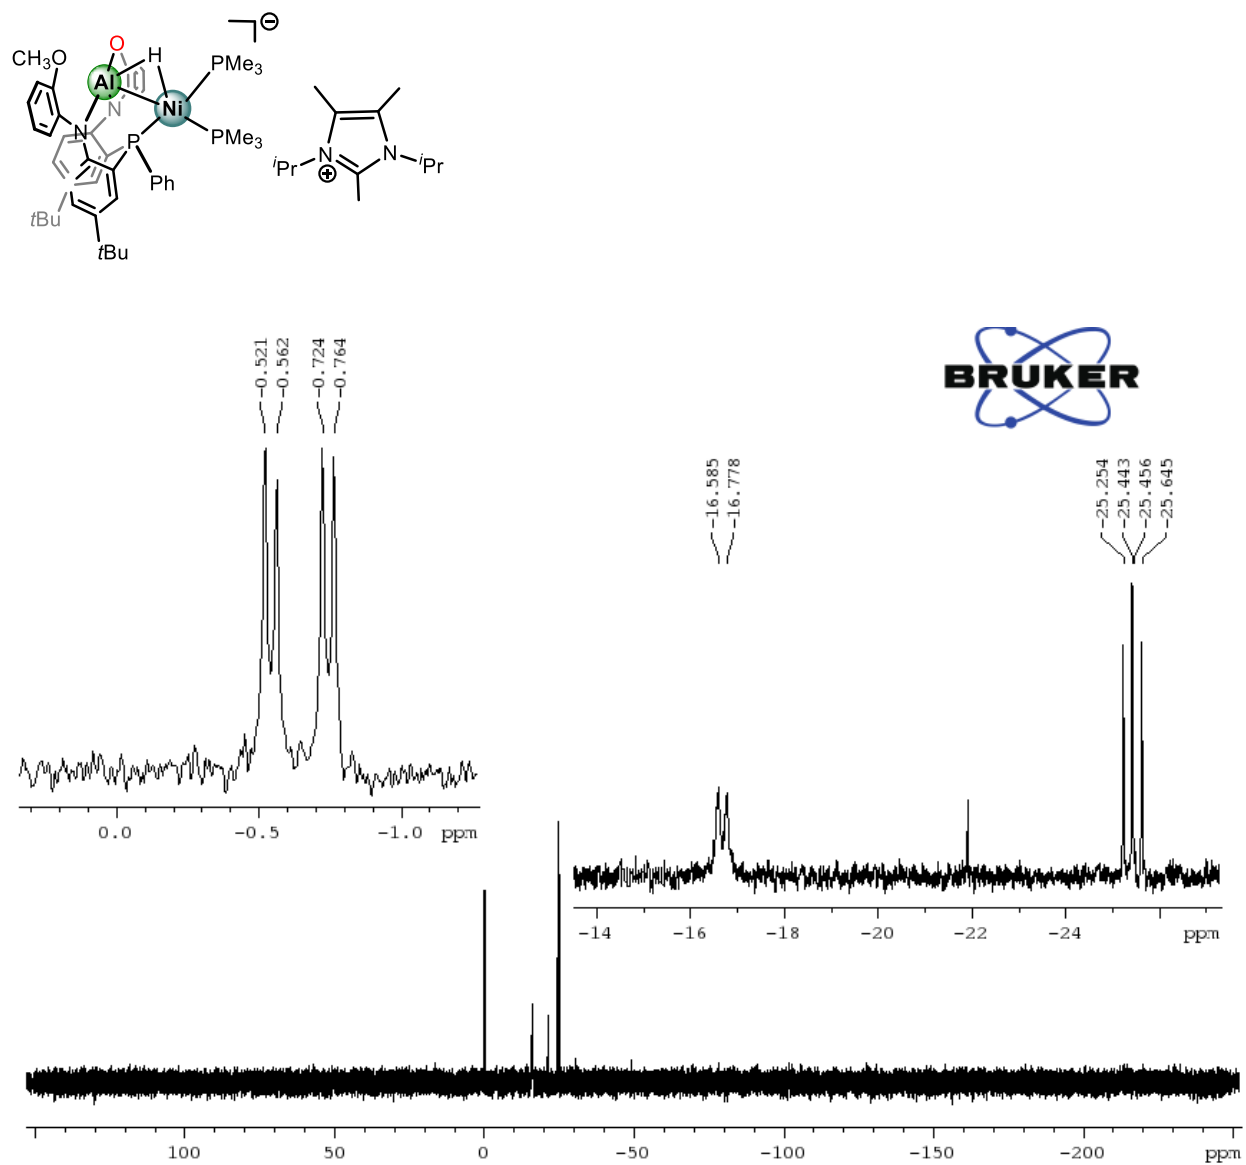

Figure S1-12: APT  $^{13}\text{C}\{^1\text{H}\}$  NMR spectrum of **3** in THF- $\text{D}_8$

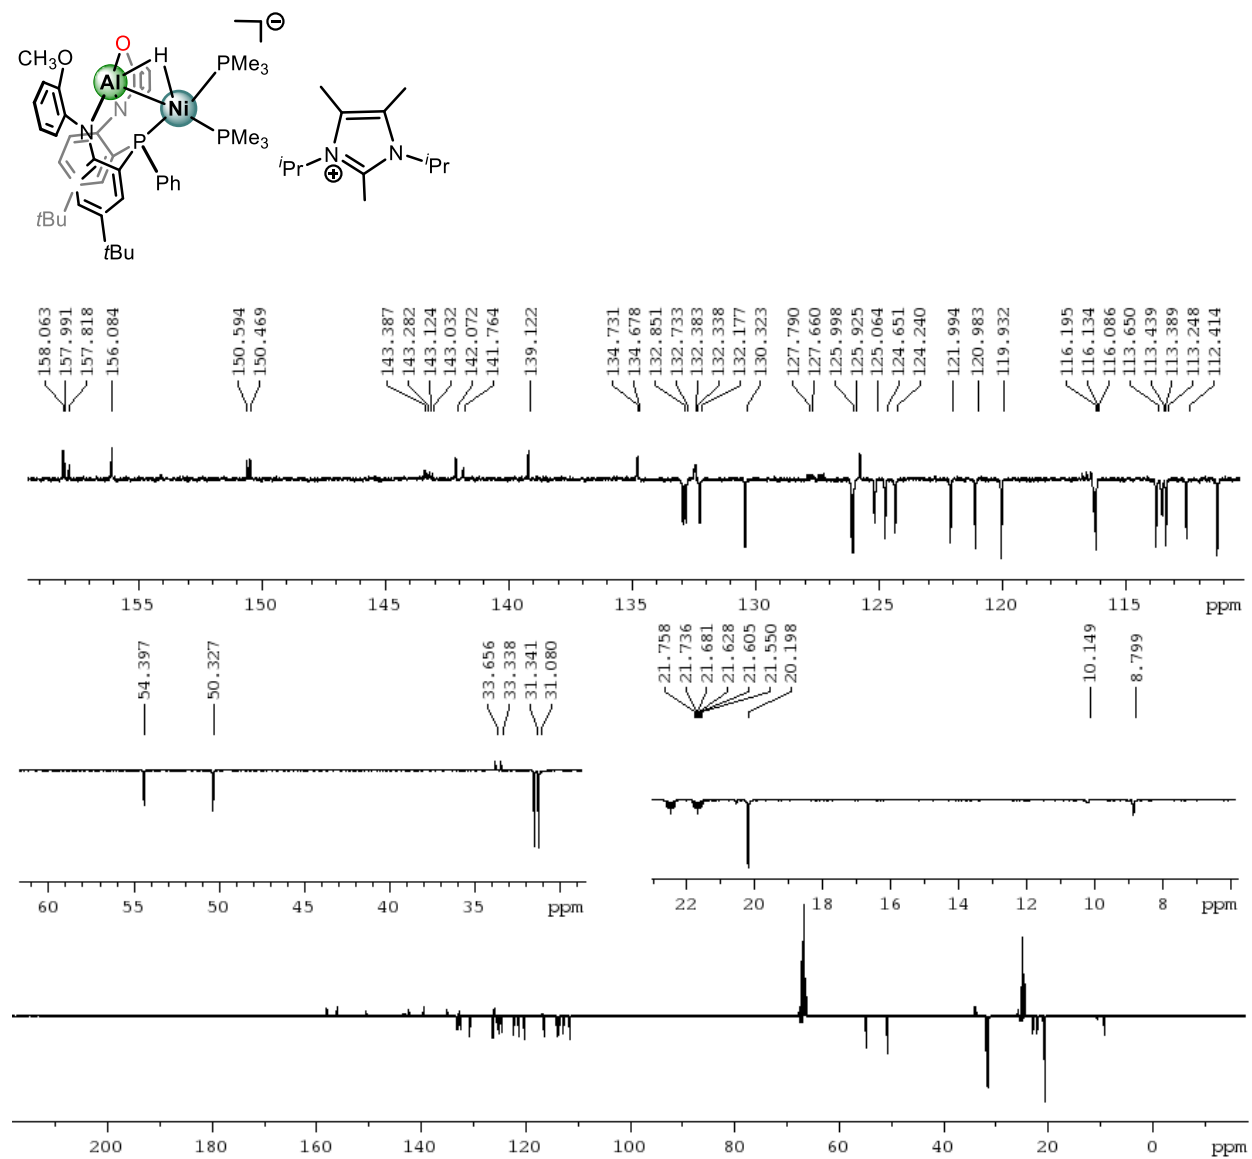

Figure S1-13:  $^1\text{H}^{13}\text{C}\{^1\text{H}\}$  HSQC NMR spectrum of **3** in  $\text{THF-D}_8$

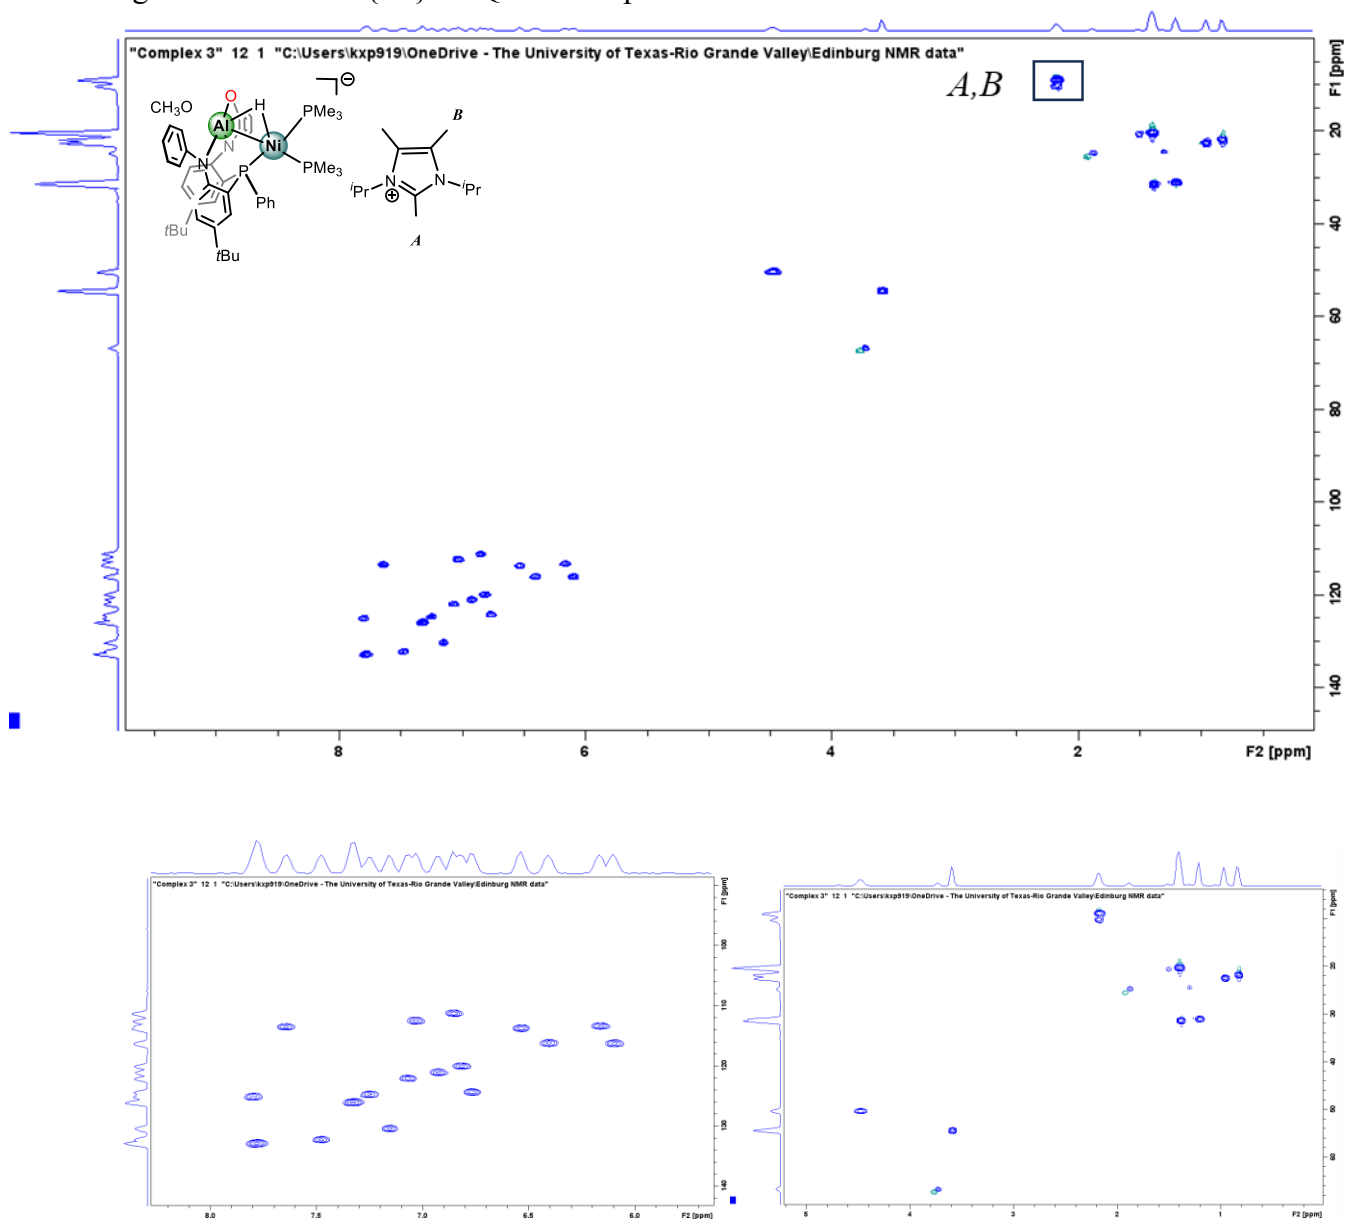

Figure S1-14:  $^1\text{H}$  NMR spectrum of crude reaction of  $2\text{-(PMe}_3)_2 + i\text{PrMe}$  in  $\text{C}_6\text{D}_6$

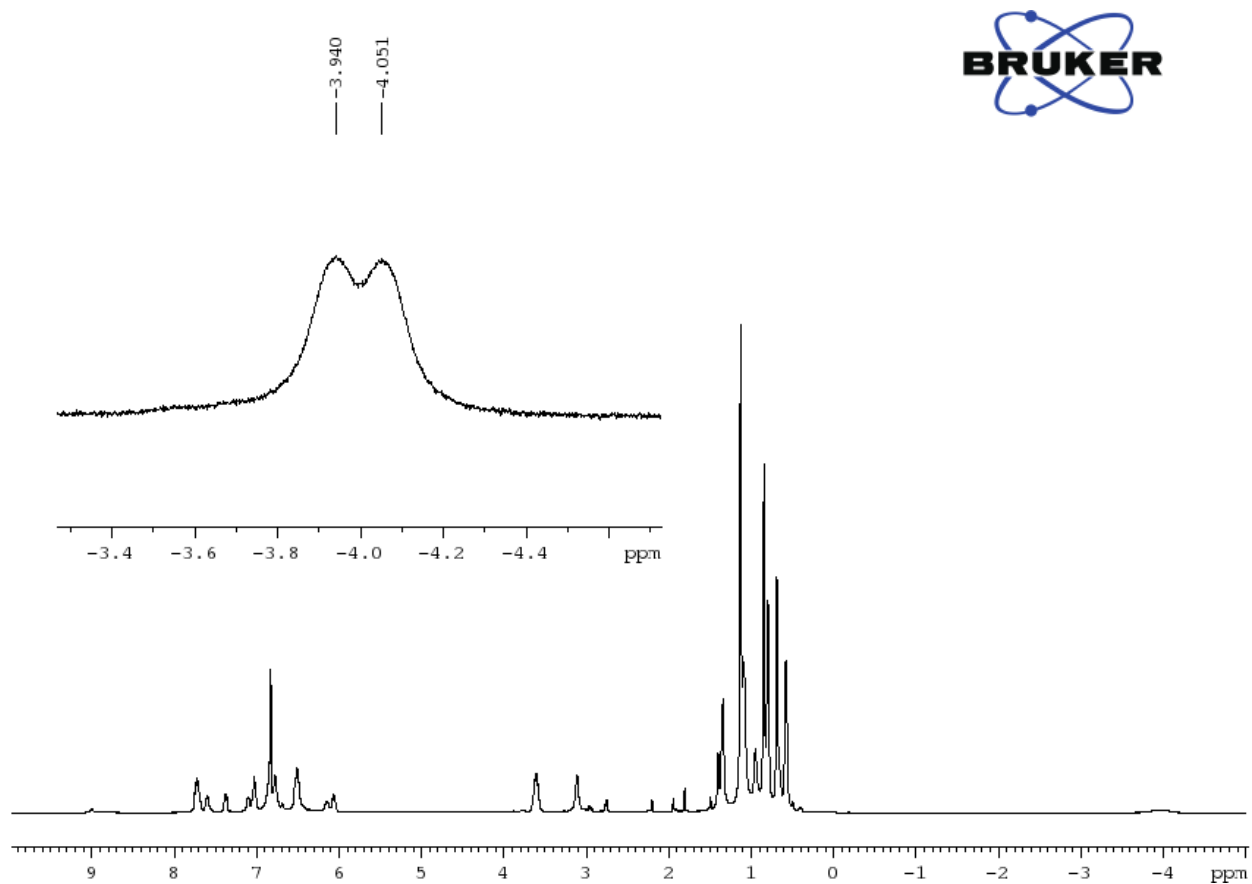

**S2: VT NMR spectra**

Figure S2-1: Variable Temperature  $^{31}\text{P}\{^1\text{H}\}$  NMR spectrum of **Complex 2-(PPh<sub>3</sub>)<sub>2</sub>** in  $\text{C}_7\text{D}_8$

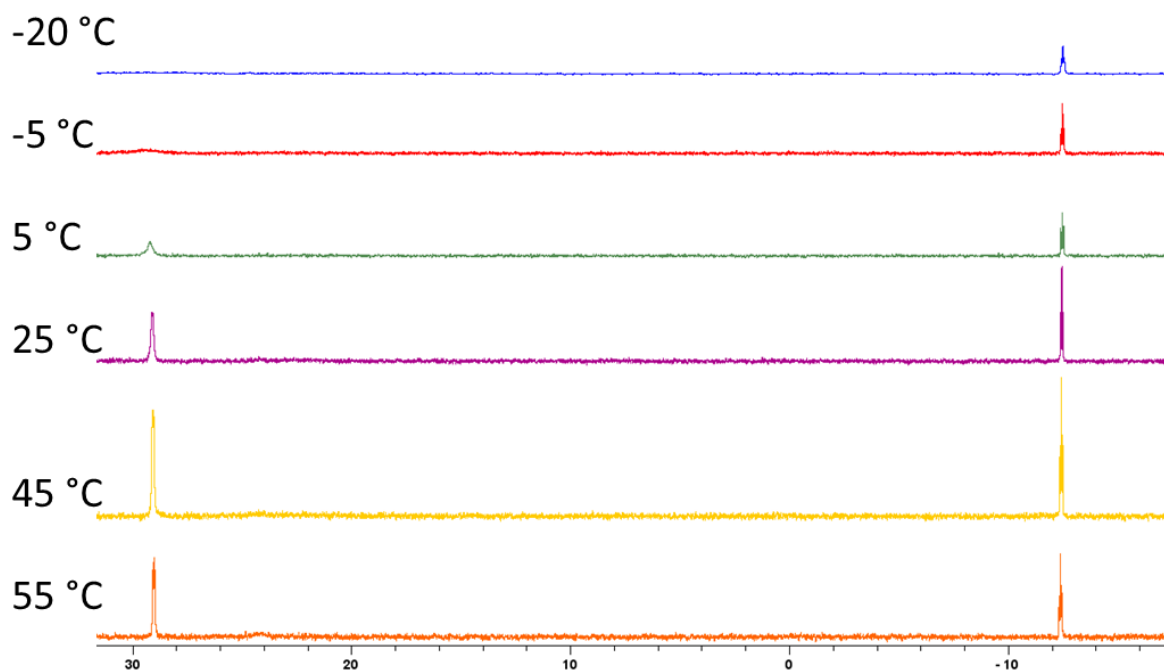



Figure S2-2: Variable Temperature  $^{31}\text{P}\{^1\text{H}\}$  NMR spectrum of **Complex 2-(PPh<sub>3</sub>)<sub>2</sub>** in  $\text{C}_7\text{D}_8$

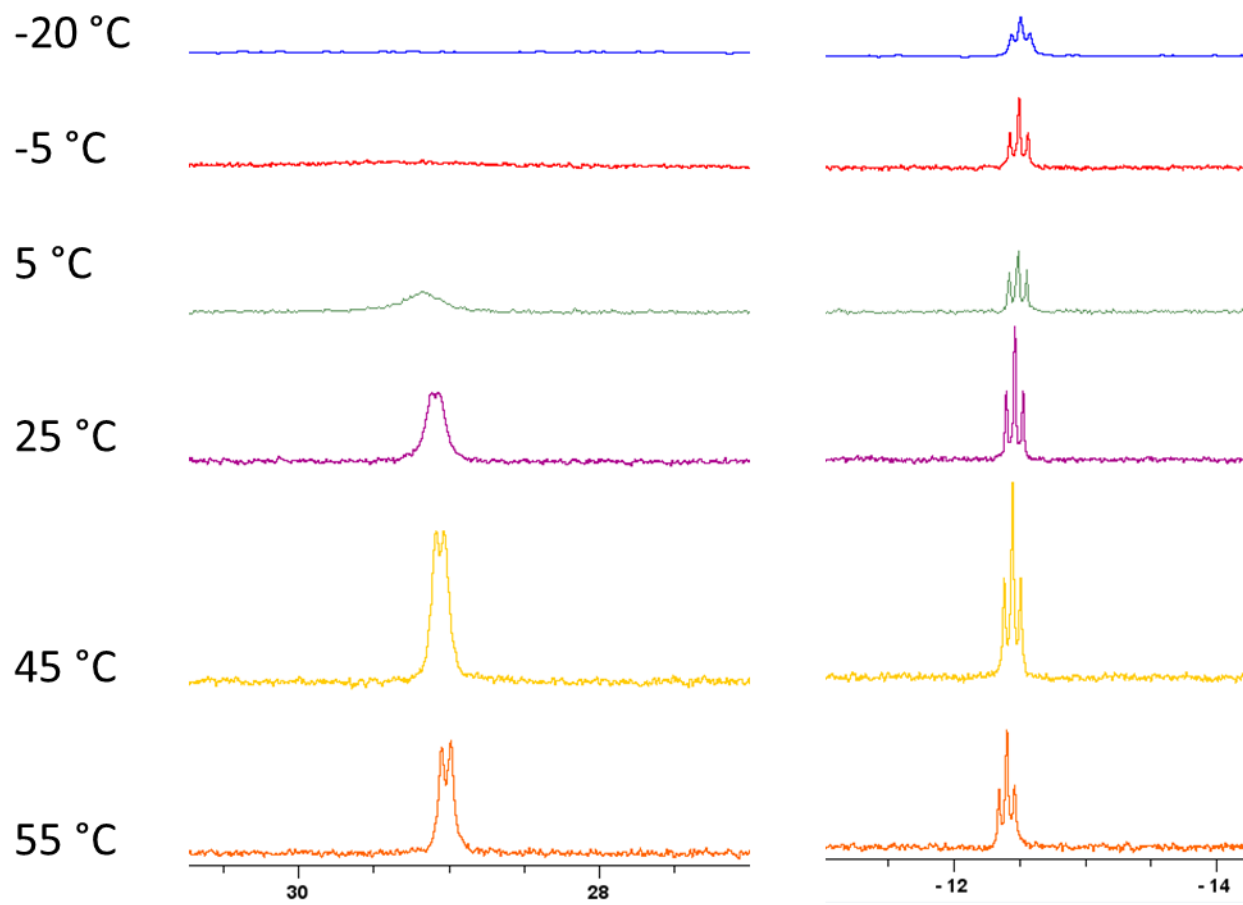

Figure S2-3: Variable Temperature  $^1\text{H}$  NMR spectrum of **Complex 2-(PPh<sub>3</sub>)<sub>2</sub>** in  $\text{C}_7\text{D}_8$

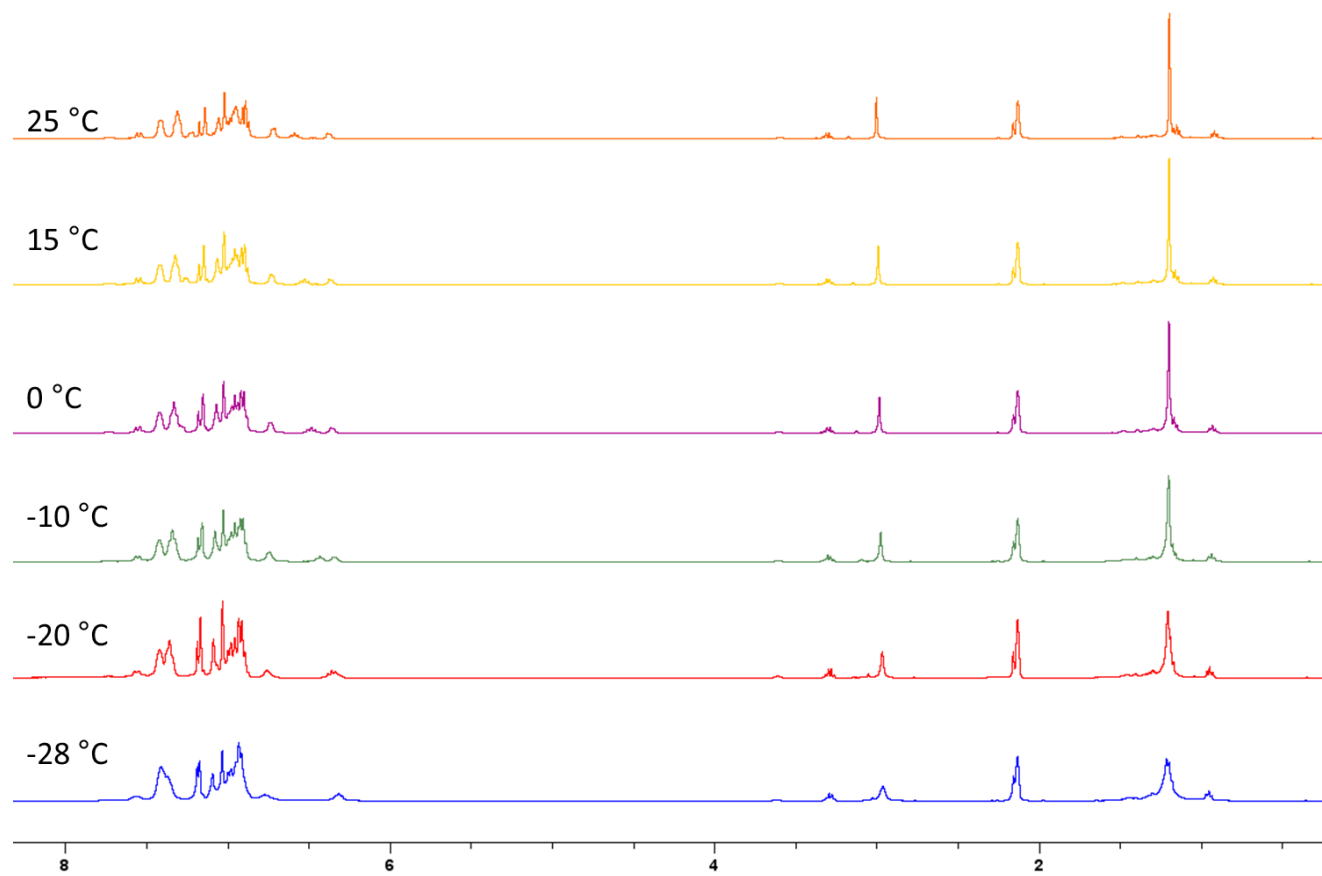

Figure S2-4: Variable Temperature  $^1\text{H}$  NMR spectrum of **Complex 2-(PPh<sub>3</sub>)<sub>2</sub>** in  $\text{C}_7\text{D}_8$

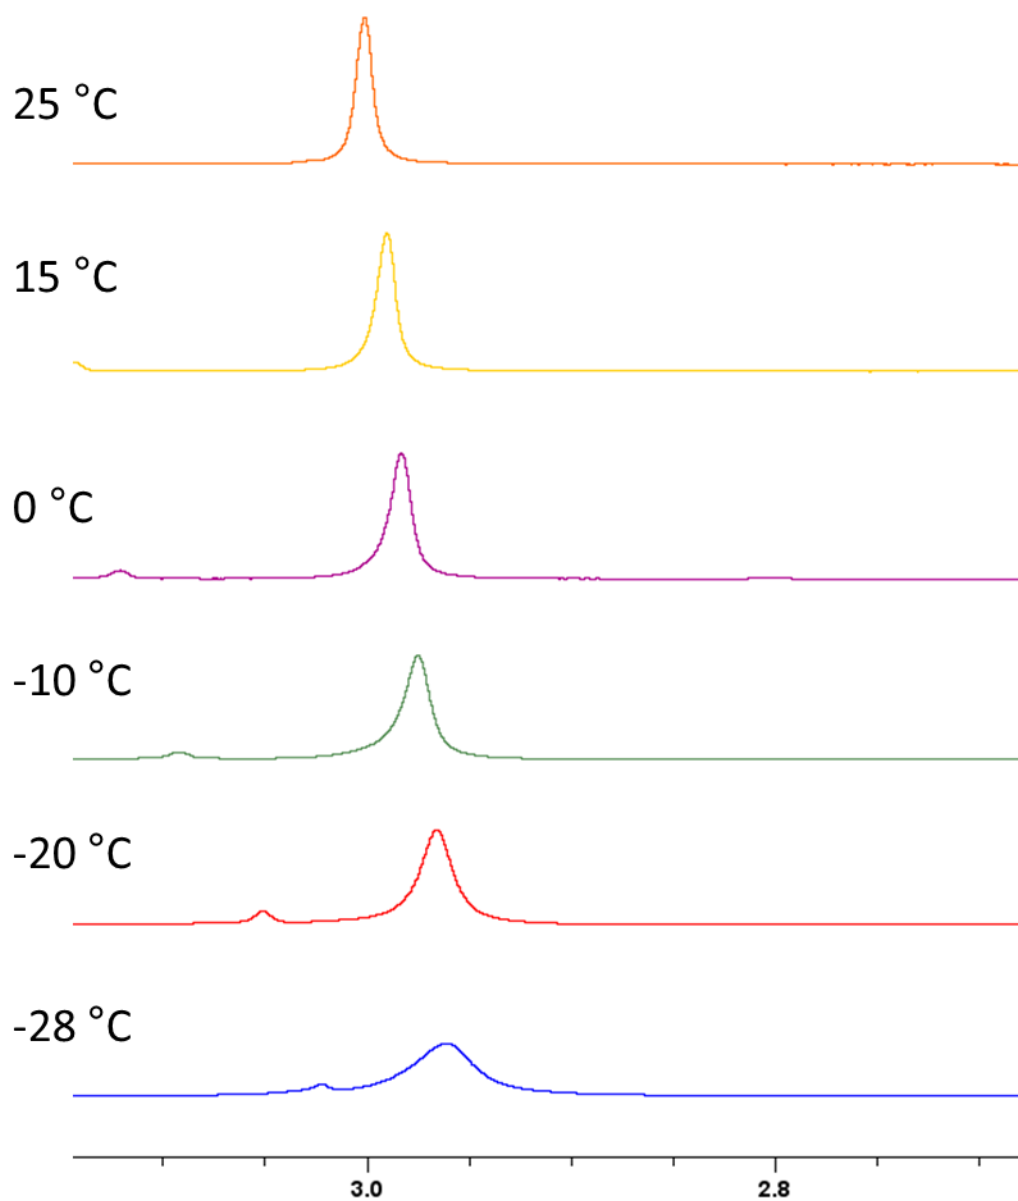

Figure S2-5: Variable Temperature  $^{31}\text{P}\{^1\text{H}\}$  NMR spectrum of **Complex 2-(dppm)<sub>2</sub>** in  $\text{C}_7\text{D}_8$

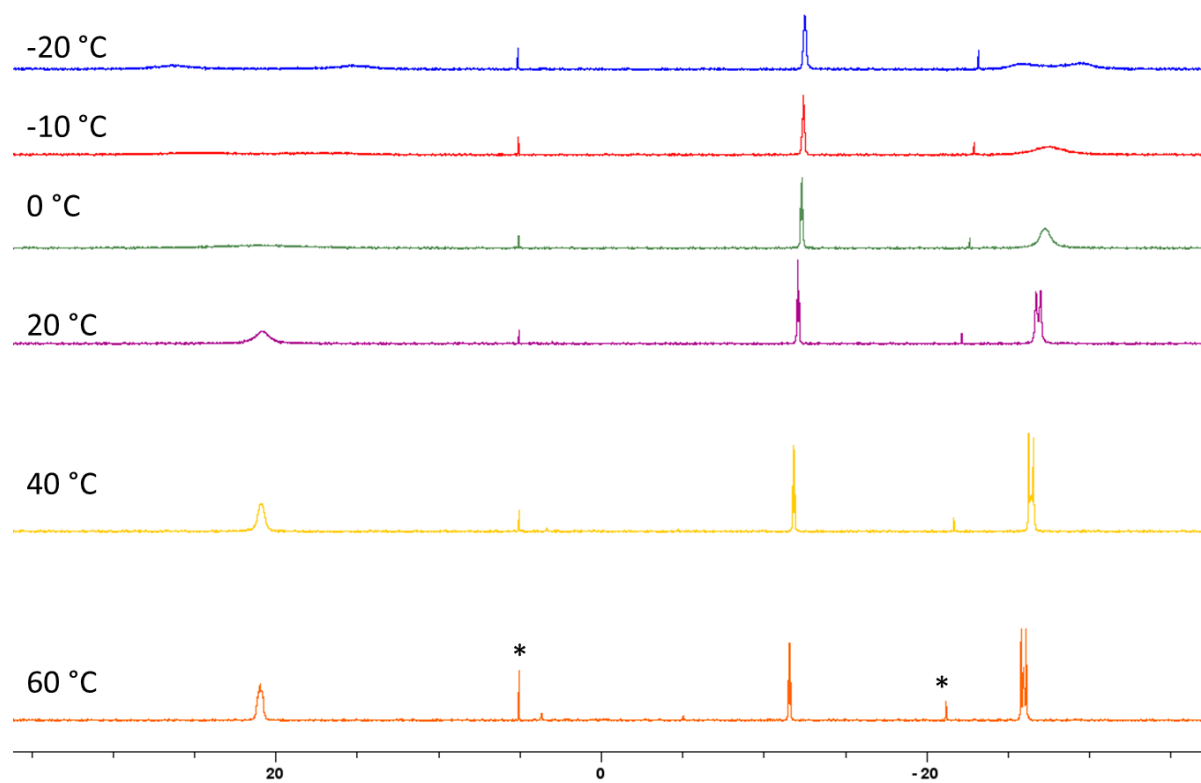

\*Impurities that increase in concentration from thermal sensitivity

Figure S2-6: Variable Temperature  $^{31}\text{P}\{^1\text{H}\}$  NMR spectrum of **Complex 2-(dppm)<sub>2</sub>** in  $\text{C}_7\text{D}_8$

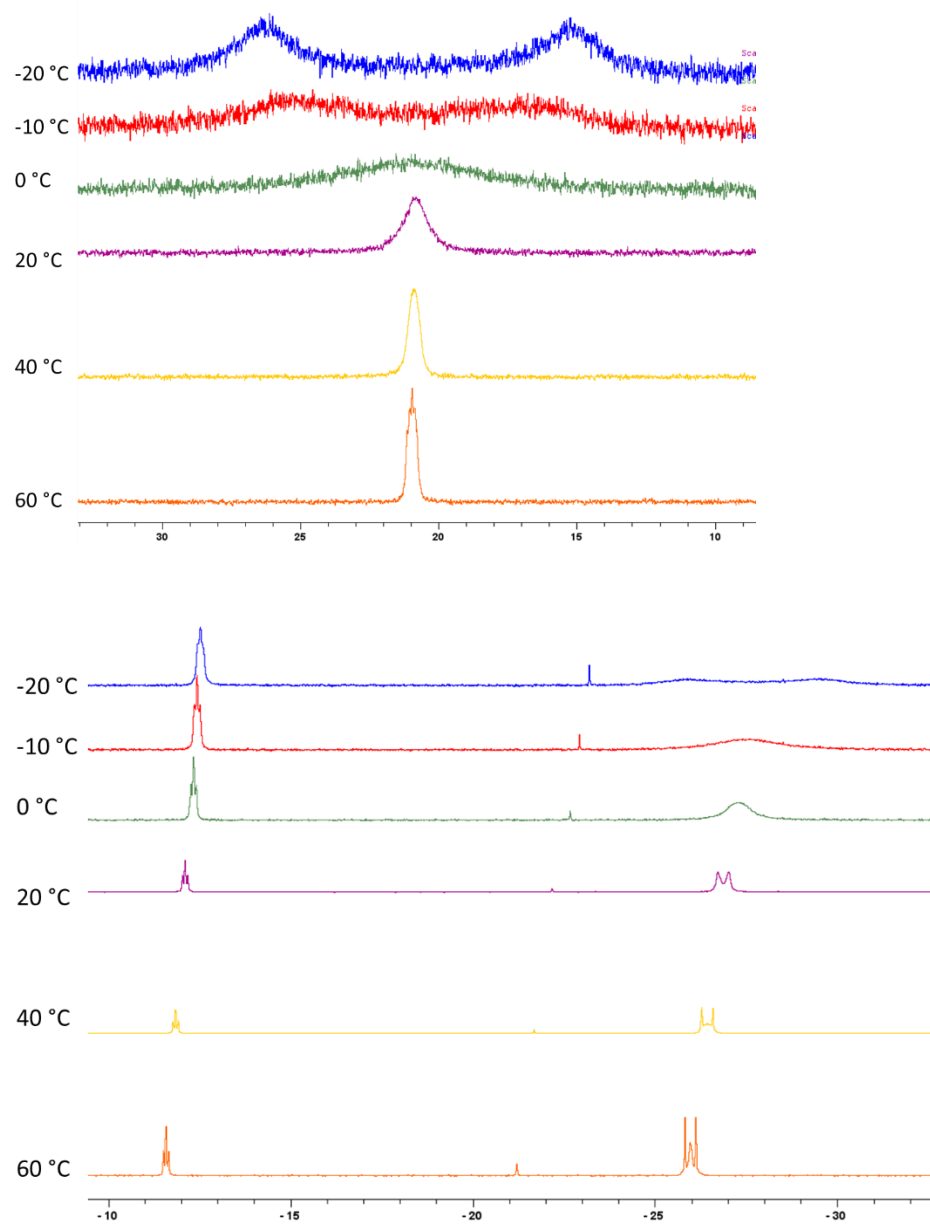

Figure S2-7:  $^{31}\text{P}\{^1\text{H}\}$  NMR spectrum of **Complex 2-(dppm)<sub>2</sub>** in  $\text{C}_7\text{D}_8$  at  $60^\circ\text{C}$

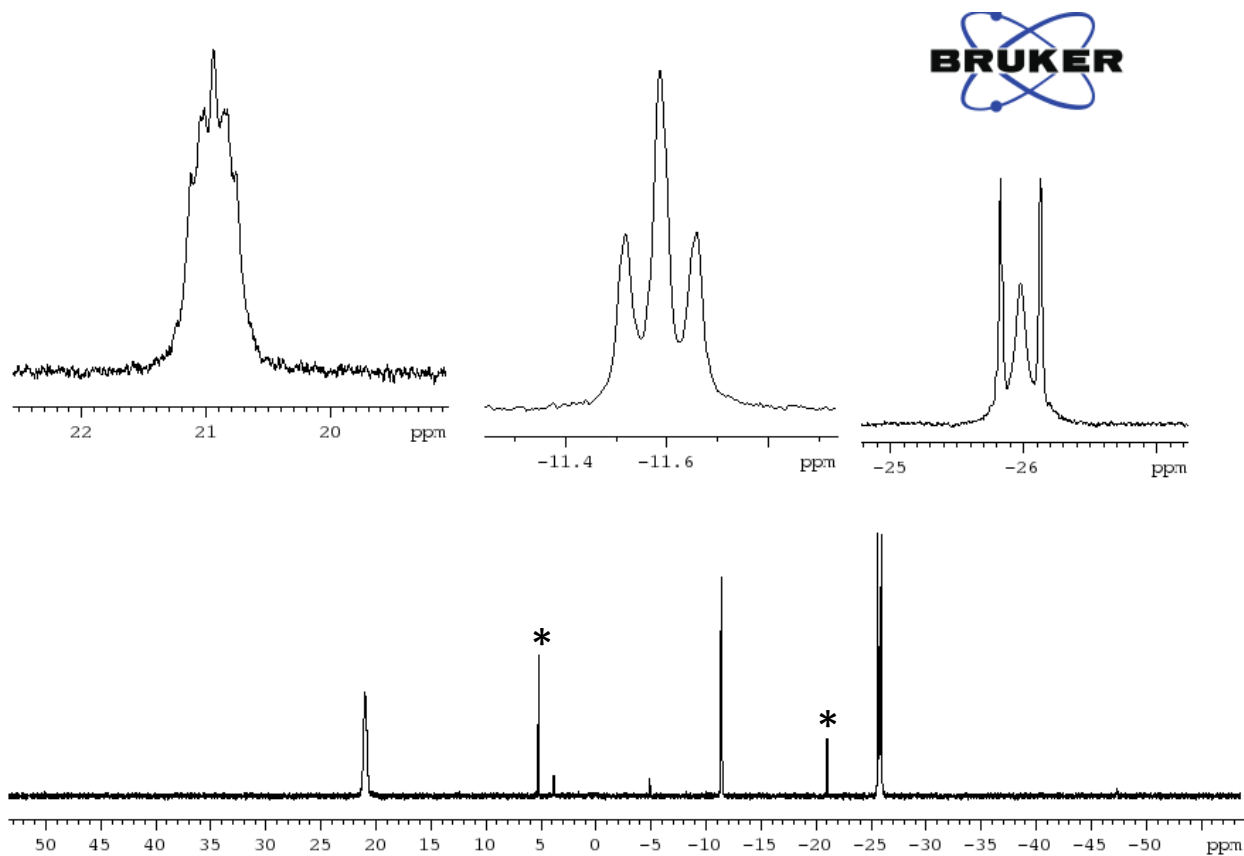

\*Impurities generated from thermal sensitivity

### S3: Computational Data

Table S3-1: Comparative bond lengths for single-crystal X-ray data and optimized computational data

|             | 1 (Å)                                        |                                      | 2-(PPh <sub>3</sub> ) <sub>2</sub> (Å) |                  | 2-(dppm) <sub>2</sub><br>(Å) |                  | 2-(PMe <sub>3</sub> ) <sub>2</sub> (Å)             |                  | 3(Å)                                         |                  |
|-------------|----------------------------------------------|--------------------------------------|----------------------------------------|------------------|------------------------------|------------------|----------------------------------------------------|------------------|----------------------------------------------|------------------|
|             | X-ray                                        | Opt.                                 | X-ray                                  | Opt.             | X-ray                        | Opt.             | X-ray                                              | Opt.             | X-ray                                        | Opt.             |
| Ni-Al       | 2.3629(7)<br>2.3683(7)                       | 2.3213<br>2.3408                     | 2.3222(16)                             | 2.2640           | 2.269-<br>2.276(4)           | 2.2778           | 2.2503(7)<br>2.2613(7)                             | 2.2542           | 2.334(1)<br>2.336(1)                         | 2.3431           |
| Ni-P1       | 2.1580(6)                                    | 2.1710                               | 2.1832(14)                             | 2.1892           | 2.169-<br>2.175(2)           | 2.2030           | 2.1410(6)<br>2.1449(6)                             | 2.1830           | 2.131(1)<br>2.133(1)                         | 2.1813           |
| Ni-<br>P2/3 | 2.1635(6)                                    | 2.1677                               | 2.2095(14)<br>2.1915(16)               | 2.2168<br>2.2037 | 2.171-<br>2.186(2)           | 2.1947<br>2.1774 | 2.1570(7)<br>2.1612(7)<br>2.1674(7)<br>2.1706(7)   | 2.1849<br>2.1794 | 2.166(1)<br>2.161(1)<br>2.156(1)<br>2.168(1) | 2.1700<br>2.1733 |
| Al-N        | 1.875(2)<br>1.879(2)<br>1.925(3)<br>1.934(2) | 1.8998<br>1.9649<br>1.9000<br>1.9265 | 1.855(4)<br>1.866(4)                   | 1.8646<br>1.8986 | 1.850-<br>1.906(6)           | 1.8722<br>1.9131 | 1.854(2)<br>1.8583(18)<br>1.8996(17)<br>1.9041(19) | 1.8775<br>1.9173 | 1.900(3)<br>1.901(3)<br>1.917(3)<br>1.918(3) | 1.9275<br>1.9515 |
| Al-O        | 1.997(2)<br>2.051(2)<br>2.213(2)<br>2.226(2) | 2.0275<br>2.0892<br>2.1483<br>2.1685 | 1.937(3)                               | 1.9762           | 1.916-<br>1.931(6)           | 1.9794           | 1.9302(16)<br>1.9514(15)                           | 1.9821           | 1.804(3)<br>1.806(3)                         | 1.8106           |
| Ni-H        | 1.57(3)<br>1.60(3)                           | 1.6266<br>1.6590                     | 1.54(4)                                | 1.6359           | 1.43-<br>1.47(13)            | 1.6368           | 1.61(4)<br>1.67(4)                                 | 1.6579           | 1.19(3)<br>1.31(3)                           | 1.6205           |
| Al-H        | 1.59(3)<br>1.61(3)                           | 1.6999<br>1.7068                     | 1.74(4)                                | 1.7127           | 1.55-<br>1.72(12)            | 1.7301           | 1.68(4)<br>1.71(4)                                 | 1.7266           | 1.88(3)<br>1.75(3)                           | 1.7341           |

Table S3-2: Calculated NPA and QTAIM Charges

|               | Atom/Bond | <b>1</b>      | <b>2-(PPh<sub>3</sub>)<sub>2</sub></b> | <b>2-(dppm)<sub>2</sub></b> | <b>2-(PMe<sub>3</sub>)<sub>2</sub></b> | <b>3</b> |
|---------------|-----------|---------------|----------------------------------------|-----------------------------|----------------------------------------|----------|
| QTAIM Charges | Ni        | -0.28         | -0.16                                  | -0.17                       | -0.20                                  | -0.16    |
|               | Al        | +2.36, +2.36  | +2.32                                  | +2.31                       | +2.31                                  | +2.34    |
|               | H         | -0.58, -0.60  | -0.60                                  | -0.59                       | -0.60                                  | -0.58    |
| NPA Charges   | Ni        | -1.29         | -1.22                                  | -1.27                       | -1.34                                  | -1.37    |
|               | Al        | +1.79, +1.77  | +1.76                                  | +1.75                       | +1.72                                  | +1.73    |
|               | H         | -0.194, -1.99 | -0.211                                 | -0.186                      | -0.175                                 | -0.142   |

Table S3-3: Molecular Orbitals of **1**

| Orbital | Energy<br>Relative to<br>HOMO |                                                                                      |
|---------|-------------------------------|--------------------------------------------------------------------------------------|
|         |                               | 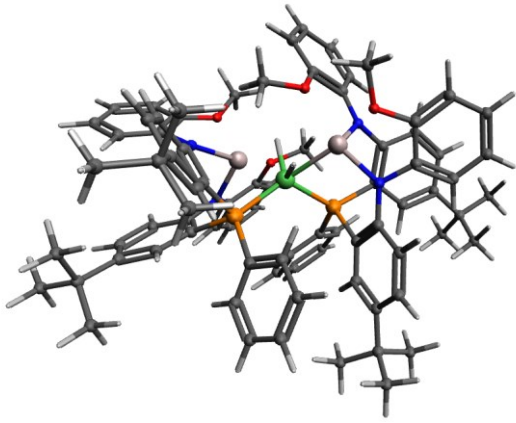 |



|           |           |                                                                                      |
|-----------|-----------|--------------------------------------------------------------------------------------|
| LUMO      | +2.195 eV | 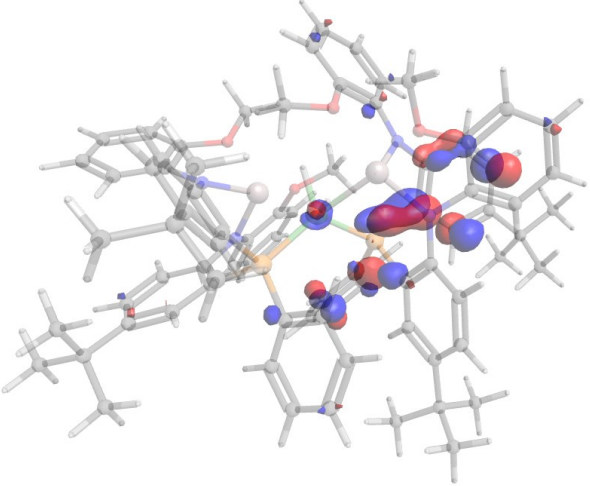   |
| HOMO      | 0.000 eV  |   |
| HOMO (-1) | -0.152 eV |  |

|           |           |                                                                                      |
|-----------|-----------|--------------------------------------------------------------------------------------|
| HOMO (-2) | -0.281 eV | 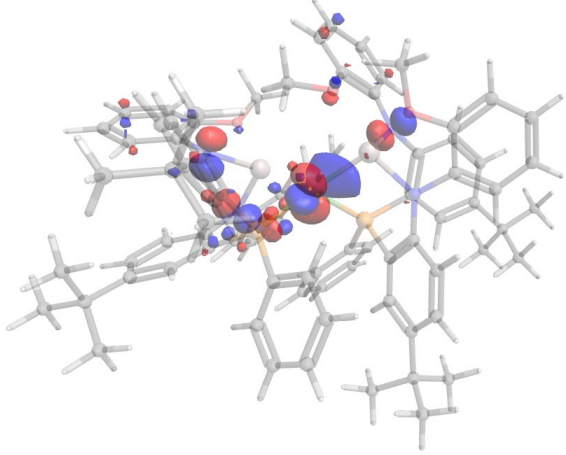   |
| HOMO (-3) | -0.606 eV |   |
| HOMO (-4) | -0.633 eV |  |

|           |           |                                                                                      |
|-----------|-----------|--------------------------------------------------------------------------------------|
| HOMO (-5) | -0.684 eV | 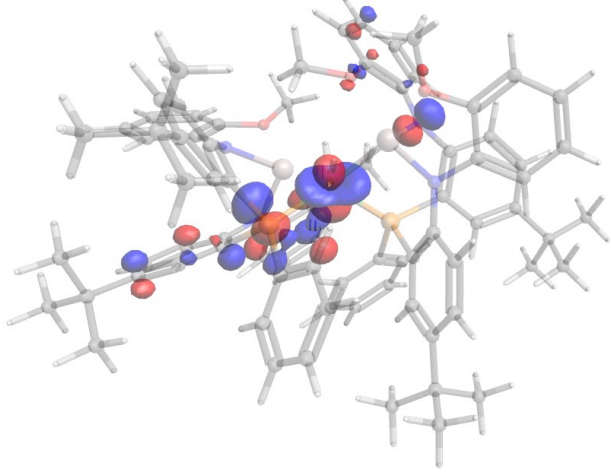   |
| HOMO (-6) | -0.919 eV |   |
| HOMO (-7) | -1.128 eV |  |

|            |           |                                                                                      |
|------------|-----------|--------------------------------------------------------------------------------------|
| HOMO (-8)  | -1.423 eV | 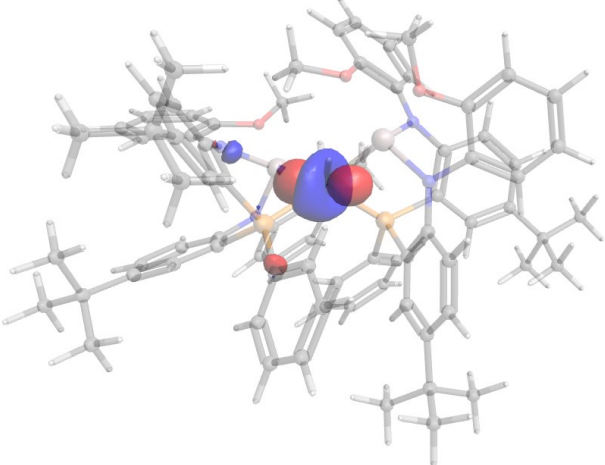   |
| HOMO (-9)  | -1.777 eV |   |
| HOMO (-10) | -1.790 eV |  |

Table S3-4: Molecular Orbitals of **2-(PPh<sub>3</sub>)<sub>2</sub>**

| Orbital | Energy Relative to HOMO | Molecular Orbital Images                                                             |
|---------|-------------------------|--------------------------------------------------------------------------------------|
| LUMO    | +2.157 eV               | 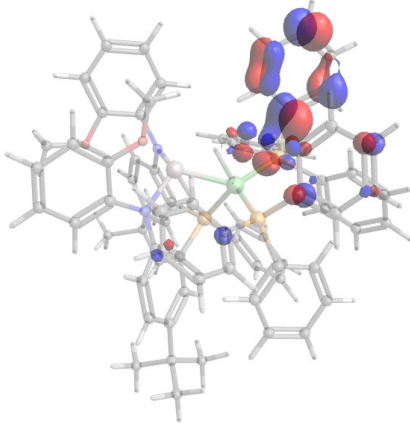  |
| HOMO    | 0.000 eV                |  |

|           |           |                                                                                      |
|-----------|-----------|--------------------------------------------------------------------------------------|
| HOMO (-1) | -0.166 eV | 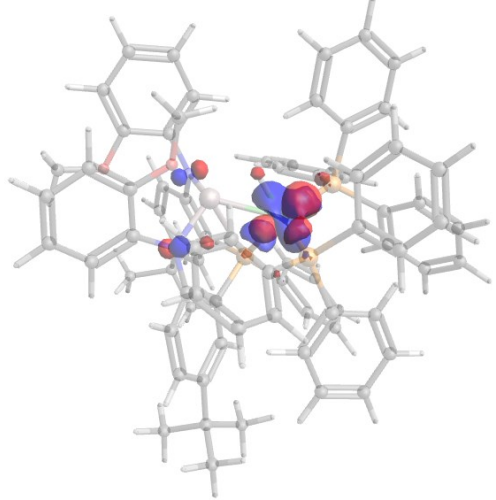   |
| HOMO (-2) | -0.315 eV |   |
| HOMO (-3) | -0.484 eV |  |

|           |           |                                                                                      |
|-----------|-----------|--------------------------------------------------------------------------------------|
| HOMO (-4) | -0.672 eV | 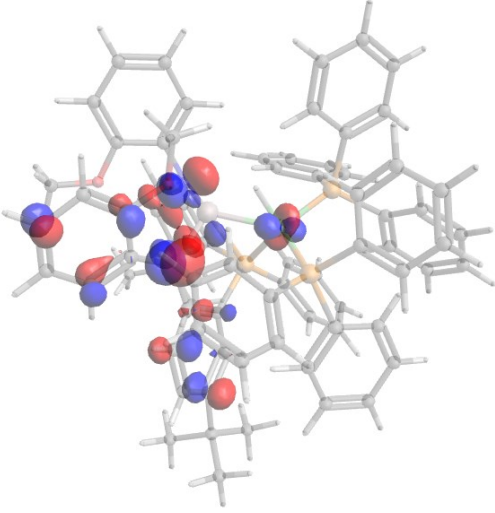   |
| HOMO (-5) | -0.927 eV |   |
| HOMO (-6) | -1.287 eV |  |

|           |           |                                                                                      |
|-----------|-----------|--------------------------------------------------------------------------------------|
| HOMO (-7) | -1.551 eV | 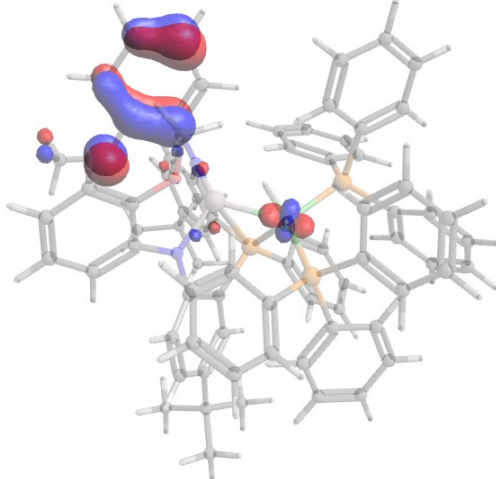   |
| HOMO (-8) | -1.698 eV |   |
| HOMO (-9) | -1.939 eV |  |



|            |           |                                                                                    |
|------------|-----------|------------------------------------------------------------------------------------|
| HOMO (-10) | -1.946 eV | 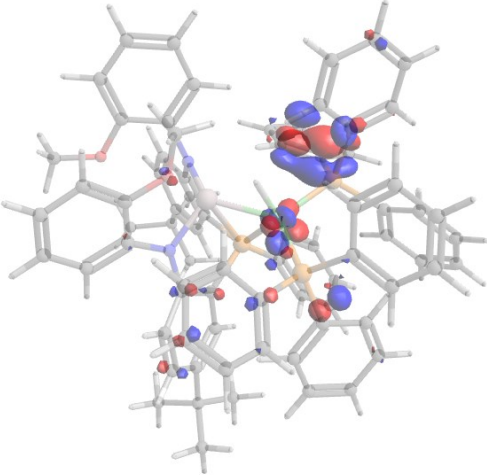 |
|------------|-----------|------------------------------------------------------------------------------------|

Table S3-5: Molecular Orbitals of **2-(dppm)<sub>2</sub>**

| Orbital | Energy<br>Relative to<br>HOMO | 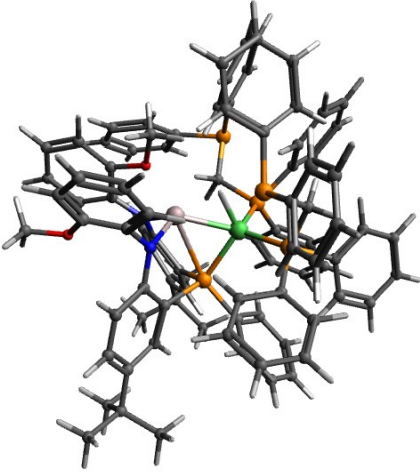 |
|---------|-------------------------------|-------------------------------------------------------------------------------------|
|---------|-------------------------------|-------------------------------------------------------------------------------------|

|           |           |                                                                                      |
|-----------|-----------|--------------------------------------------------------------------------------------|
| LUMO      | +2.006 eV | 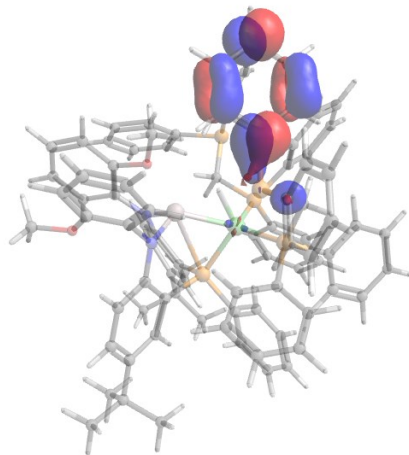   |
| HOMO      | 0.000 eV  |   |
| HOMO (-1) | -0.080 eV |  |

|           |           |                                                                                      |
|-----------|-----------|--------------------------------------------------------------------------------------|
| HOMO (-2) | -0.257 eV | 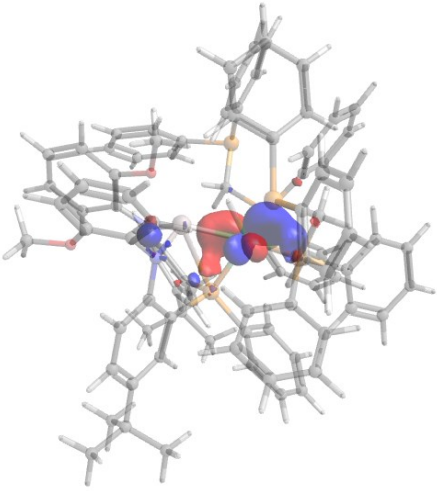   |
| HOMO (-3) | -0.406 eV |   |
| HOMO (-4) | -0.613 eV |  |

|           |           |                                                                                      |
|-----------|-----------|--------------------------------------------------------------------------------------|
| HOMO (-5) | -0.905 eV | 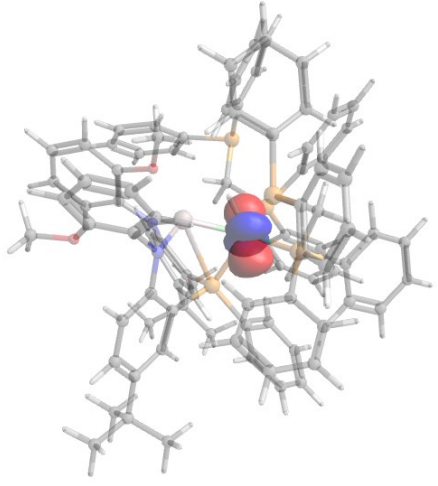   |
| HOMO (-6) | -1.237 eV |   |
| HOMO (-7) | -1.398 eV |  |

|            |           |                                                                                      |
|------------|-----------|--------------------------------------------------------------------------------------|
| HOMO (-8)  | -1.443 eV | 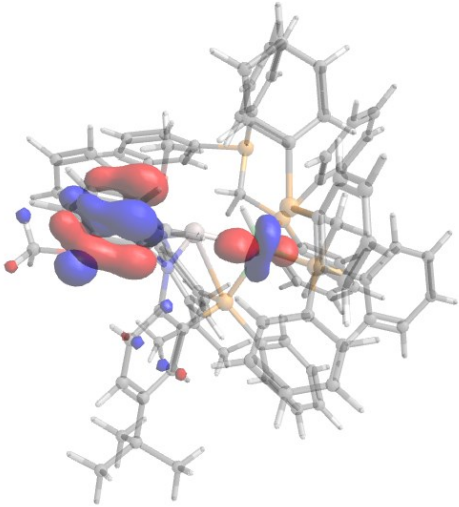   |
| HOMO (-9)  | -1.478 eV |   |
| HOMO (-10) | -1.647 eV |  |

Table S3-6: Molecular Orbitals of 2-(PMe<sub>3</sub>)<sub>2</sub>

| Orbital | Energy<br>Relative to<br>HOMO | Molecular Orbital Images                                                             |
|---------|-------------------------------|--------------------------------------------------------------------------------------|
| LUMO    | +2.130 eV                     | 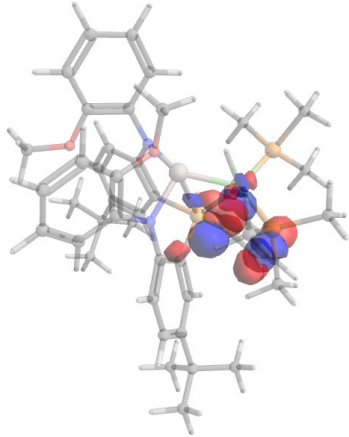  |
| HOMO    | 0.000 eV                      |  |

|           |           |                                                                                      |
|-----------|-----------|--------------------------------------------------------------------------------------|
| HOMO (-1) | -0.142 eV | 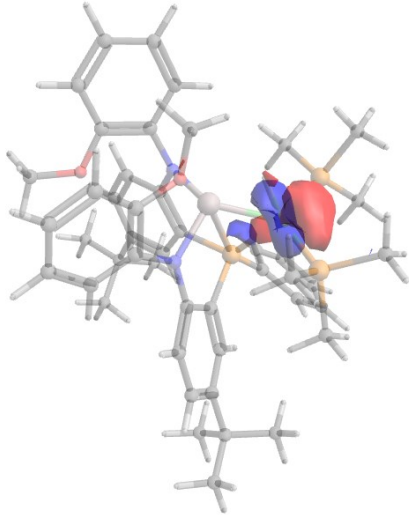   |
| HOMO (-2) | -0.311 eV |   |
| HOMO (-3) | -0.574 eV |  |

|           |           |                                                                                      |
|-----------|-----------|--------------------------------------------------------------------------------------|
| HOMO (-4) | -0.769 eV | 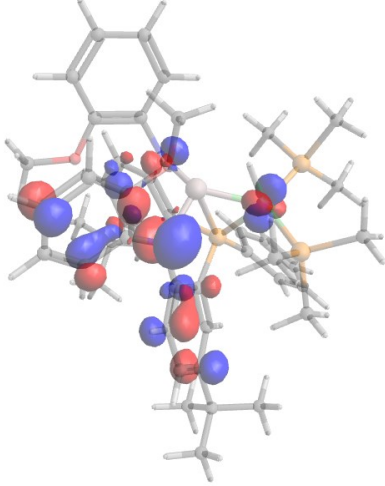   |
| HOMO (-5) | -0.963 eV |   |
| HOMO (-6) | -1.300 eV |  |



|           |           |                                                                                      |
|-----------|-----------|--------------------------------------------------------------------------------------|
| HOMO (-7) | -1.650 eV | 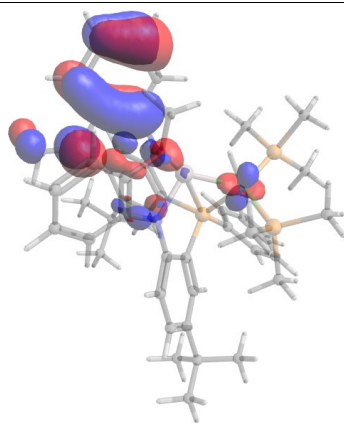   |
| HOMO (-8) | -1.876 eV |   |
| HOMO (-9) | -2.167 eV |  |

|            |           |                                                                                    |
|------------|-----------|------------------------------------------------------------------------------------|
| HOMO (-10) | -2.313 eV | 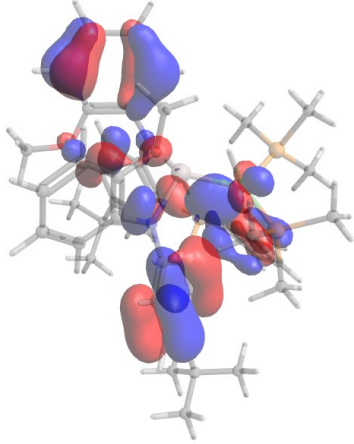 |
|------------|-----------|------------------------------------------------------------------------------------|

Table S3-7: Molecular Orbitals of **3**

| Orbital | Energy<br>Relative to<br>HOMO | Molecular Orbital Images                                                             |
|---------|-------------------------------|--------------------------------------------------------------------------------------|
|         |                               | 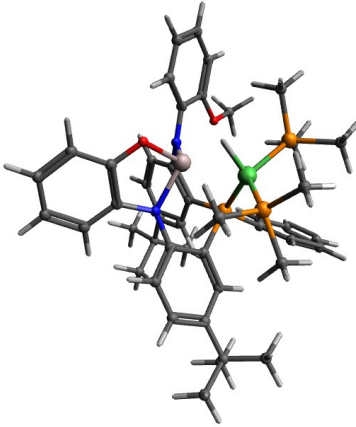 |

|           |           |                                                                                      |
|-----------|-----------|--------------------------------------------------------------------------------------|
| LUMO      | +1.684 eV | 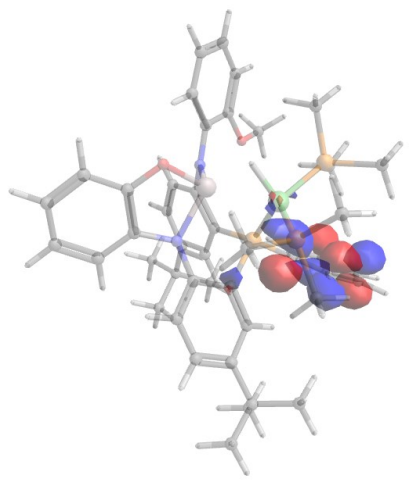   |
| HOMO      | 0.000 eV  |   |
| HOMO (-1) | -0.146 eV |  |

|           |           |                                                                                      |
|-----------|-----------|--------------------------------------------------------------------------------------|
| HOMO (-2) | -0.328 eV | 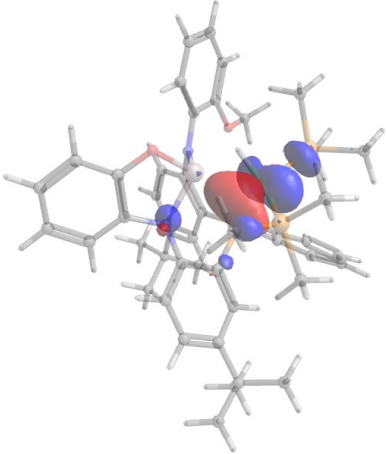   |
| HOMO (-3) | -0.407 eV |   |
| HOMO (-4) | -0.717 eV |  |

|           |           |                                                                                      |
|-----------|-----------|--------------------------------------------------------------------------------------|
| HOMO (-5) | -0.985 eV | 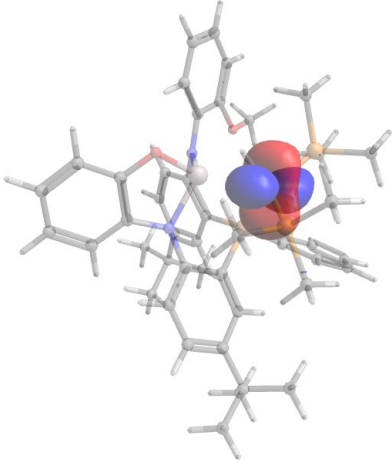   |
| HOMO (-6) | -1.241 eV |   |
| HOMO (-7) | -1.298 eV |  |

|            |           |                                                                                      |
|------------|-----------|--------------------------------------------------------------------------------------|
| HOMO (-8)  | -1.820 eV | 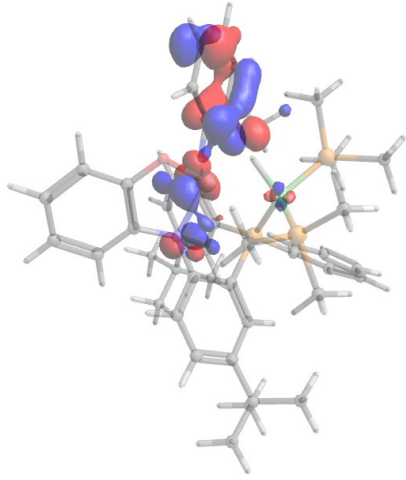   |
| HOMO (-9)  | -2.035 eV |   |
| HOMO (-10) | -2.285 eV |  |

Table S3-8: DFT Calculated Hydricity in Acetonitrile

| <b>Complex</b>                         | <b>Hydricity (kcal/mol)</b> |
|----------------------------------------|-----------------------------|
| <b>1</b>                               | 57.9, 61.9                  |
| <b>2-(PPh<sub>3</sub>)<sub>2</sub></b> | 59.3                        |
| <b>2-(dppm)<sub>2</sub></b>            | 59.8                        |
| <b>2-(PMe<sub>3</sub>)<sub>2</sub></b> | 54.1                        |
| <b>3</b>                               | 40.1                        |

***S4: Crystallography***

**Crystallography.** Complete details of the structures can be obtained from the Cambridge Crystallographic Data Centre at [www.ccdc.cam.ac.uk](http://www.ccdc.cam.ac.uk). The CCDC accession numbers for the reported complexes are 2362005, 2362006, 2362008, and 2362009.

## X-ray images from Mercury for heterobimetallic complex 2-(PPh<sub>3</sub>)<sub>2</sub>

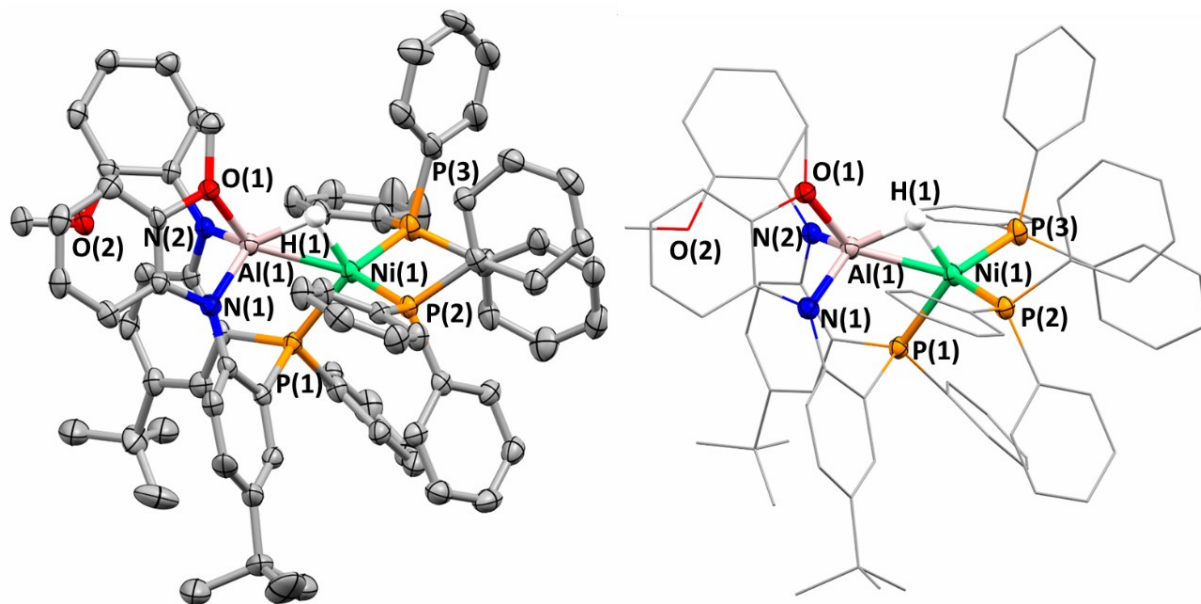

### Special Refinement Details of heterobimetallic complex 2-(PPh<sub>3</sub>)<sub>2</sub>:

Single crystals of C<sub>76</sub>H<sub>65</sub>AlN<sub>2</sub>NiO<sub>2</sub>P<sub>3</sub> (**2-(PPh<sub>3</sub>)<sub>2</sub>**) were prepared by vapor diffusion benzene/pentane. Suitable crystals of each sample were mounted in polybutene oil in a nitrogen glovebox, transferred to a nylon loop, and then quickly placed to the goniometer head of a Rigaku XtaLAB Synergy-S Dualflex, HyPix Arc-150 diffractometer with CuK $\alpha$  radiation ( $\lambda = 1.54184$  Å). All data was collected at 100.15 K. Data collection and unit cell refinement were performed using *CrysAlisPro*<sup>1</sup> software. Data processing and absorption correction were accomplished with *CrysAlisPro* and *SCALE3 ABSPACK*,<sup>2</sup> respectively. The structure was solved with the ShelXT<sup>3</sup> structure solution program using direct methods and Olex2<sup>4</sup> as the graphical interface. The model was refined with ShelXL<sup>5</sup> using full-matrix, least squares minimization. SQUEEZE was used to suppress two sections of electron density likely corresponding to two highly disordered molecules of benzene. All non-hydrogen atoms were refined with anisotropic displacement parameters. The



hydrogen atom attached to the aluminum and nickel ion, was determined by electron density plot.  
All other hydrogen atom positions were determined by geometry and refined by a riding model.

## X-ray images from Mercury for heterobimetallic complex 2-(dppm)<sub>2</sub>

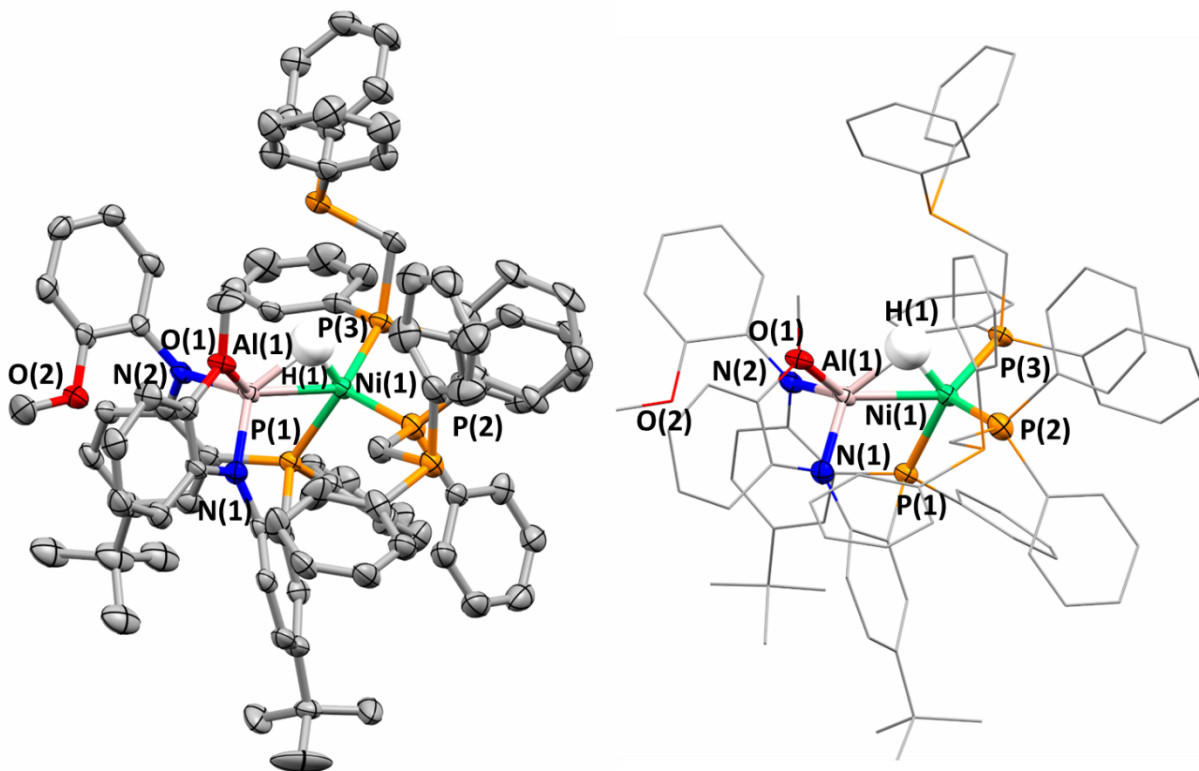

### Special Refinement Details of heterobimetallic complex 2-(dppm)<sub>2</sub>:

Single crystals of  $C_{102}H_{99}AlN_2NiO_2P_5(2-(dppm)_2)$  were prepared by slow evaporation of a benzene solution. A suitable dark yellow plate-like crystal, with dimensions of 0.310 mm  $\times$  0.110 mm  $\times$  0.060 mm, was mounted in paratone oil onto a nylon loop. All data were collected at 100.0(1) K, using a XtaLAB Synergy/ Dualflex, HyPix fitted with  $CuK\alpha$  radiation ( $\lambda = 1.54184$  Å). Data collection and unit cell refinement were performed using *CrysAlisPro* software.<sup>1</sup> The total number of data were measured in the  $5.6^\circ < 2\theta < 153.8^\circ$  using  $\omega$  scans. Data processing and absorption correction, giving minimum and maximum transmission factors (0.559, 1.000) were accomplished with *CrysAlisPro*<sup>1</sup> and *SCALE3 ABSPACK*,<sup>2</sup> respectively. The structure, using *Olex2*<sup>4</sup>, was solved with the *ShelXT*<sup>3</sup> structure solution program using direct methods and refined (on F<sub>2</sub>) with the *ShelXL*<sup>5</sup> refinement package using full-matrix, least-squares techniques. All non-

hydrogen atoms were refined with anisotropic displacement parameters. The hydrogen atom attached to the aluminum and nickel ion, was determined by electron density plot. All other hydrogen atom positions were determined by geometry and refined by a riding model. A solvent mask was performed to remove disordered solvent molecules (4 benzene molecules) from the crystal lattice. PLATON was used to search for a higher symmetry space group, but no obvious space group was found.

## X-ray images from Mercury for heterobimetallic complex 2-(PMe<sub>3</sub>)<sub>2</sub>

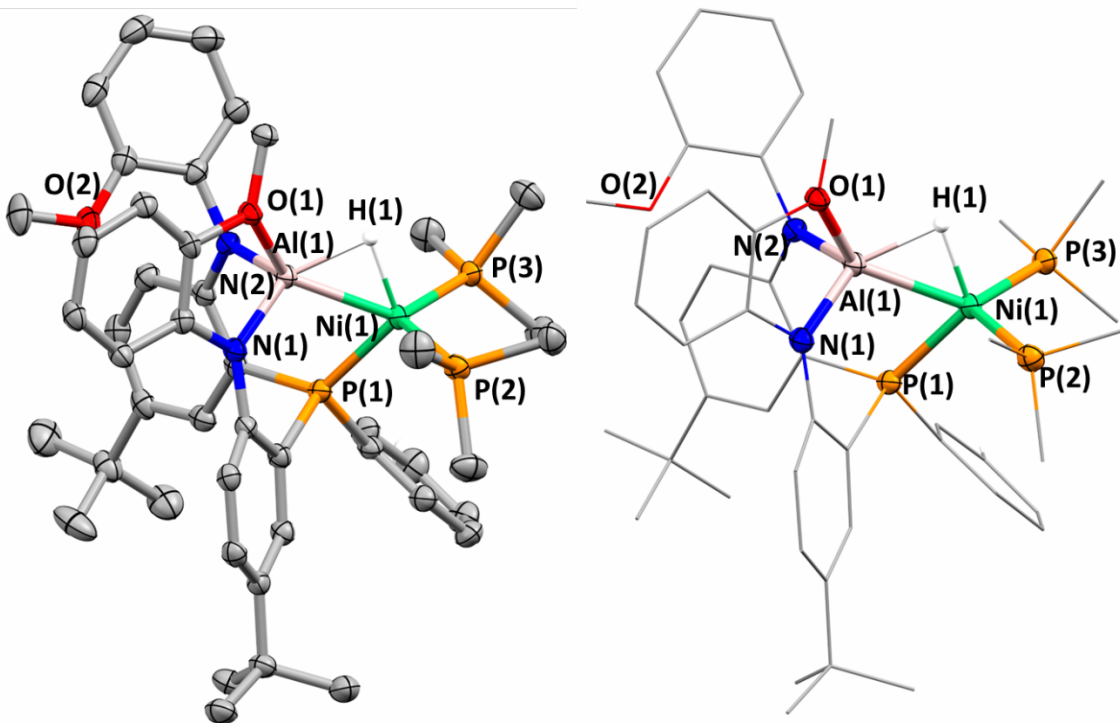

### Special Refinement Details of heterobimetallic complex 2-(PMe<sub>3</sub>)<sub>2</sub>:

Single crystals of C<sub>46</sub>H<sub>58</sub>AlN<sub>2</sub>NiO<sub>2</sub>P<sub>3</sub> (**2-(PMe<sub>3</sub>)<sub>2</sub>**) were prepared by slow evaporation of diethyl ether. Suitable crystals of each sample were mounted in polybutene oil in a nitrogen glovebox, transferred to a nylon loop, and then quickly placed to the goniometer head of a Rigaku XtaLAB Synergy-S Dualflex, HyPix Arc-150 diffractometer with CuK $\alpha$  radiation ( $\lambda = 1.54184 \text{ \AA}$ ). All data was collected at 100.15 K. Data collection and unit cell refinement were performed using *CrysAlisPro*<sup>1</sup> software. Data processing and absorption correction were accomplished with *CrysAlisPro* and *SCALE3 ABSPACK*<sup>2</sup>, respectively. The structure was solved with the ShelXT<sup>4</sup> structure solution program using direct methods and Olex2<sup>3</sup> as the graphical interface. The model was refined with ShelXL<sup>5</sup> using full-matrix, least squares minimization. The hydrogen atom

attached to the aluminum and nickel ion, was determined by electron density plot. All other hydrogen atom positions were determined by geometry and refined by a riding model.

### X-ray images from Mercury for heterobimetallic complex 3

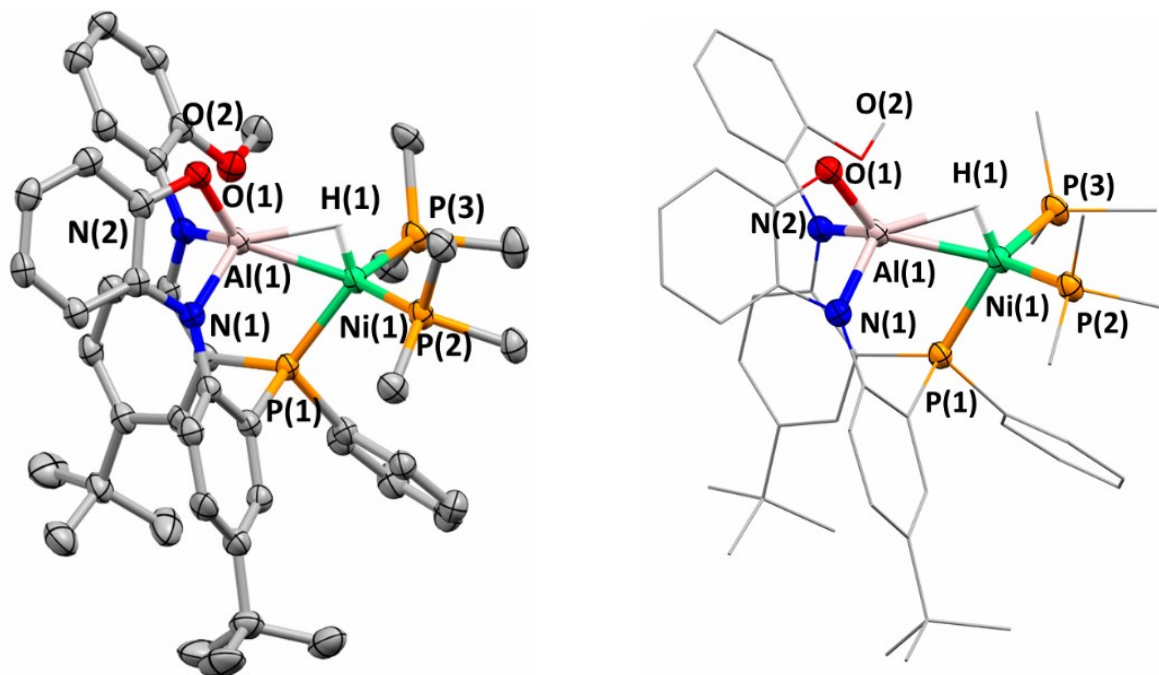

#### Special Refinement Details of Complex 3:

Single crystals of  $C_{65}H_{97}AlN_4NiO_4P_3$ (**3**) were prepared by slow evaporation of hexamethyldisiloxane into a THF solution. A suitable dark yellow block-like crystal, with dimensions of 0.273 mm  $\times$  0.128 mm  $\times$  0.102 mm, was mounted in paratone oil onto a nylon loop. All data were collected at 100.0(1) K and 298(1) K, using a XtaLAB Synergy/ Dualflex, HyPix fitted with CuK $\alpha$  radiation ( $\lambda = 1.54184$  Å). Data collection and unit cell refinement were performed using *CrysAlisPro* software.<sup>1</sup> The total number of data were measured in the  $5.4^\circ < 2\theta < 153.0^\circ$  for compound (**3**) using  $\omega$  scans. Data processing and absorption correction, giving minimum and maximum transmission factors (0.177, 1.000 for compound (**3**)) were accomplished

with *CrysAlisPro*<sup>1</sup> and *SCALE3 ABSPACK*<sup>2</sup>, respectively. The structure, using *Olex2*<sup>4</sup>, was solved with the *ShelXT*<sup>3</sup> structure solution program using direct methods and refined (on F2) with the *ShelXL*<sup>5</sup> refinement package using full-matrix, least-squares techniques. All non-hydrogen atoms were refined with anisotropic displacement parameters. The hydrogen atom attached to the aluminum and nickel ion, was determined by electron density plot. All other hydrogen atom positions were determined by geometry and refined by a riding model.

**Table S4-1: Crystallographic Information of Heterobimetallic Complexes**

| Compound         | <b>2-(PPh<sub>3</sub>)<sub>2</sub></b>                                           | <b>2-(dppm)<sub>2</sub></b>                                                                                     | <b>2-(PMe<sub>3</sub>)<sub>2</sub></b>                                                                           | <b>3</b>                                                                         |
|------------------|----------------------------------------------------------------------------------|-----------------------------------------------------------------------------------------------------------------|------------------------------------------------------------------------------------------------------------------|----------------------------------------------------------------------------------|
| Chemical Formula | C <sub>76</sub> H <sub>74</sub> AlN <sub>2</sub> NiO <sub>2</sub> P <sub>3</sub> | C <sub>204</sub> H <sub>199</sub> Al <sub>2</sub> N <sub>4</sub> Ni <sub>2</sub> O <sub>4</sub> P <sub>10</sub> | C <sub>96</sub> H <sub>130</sub> Al <sub>2</sub><br>N <sub>4</sub> Ni <sub>2</sub> O <sub>5</sub> P <sub>6</sub> | C <sub>65</sub> H <sub>97</sub> AlN <sub>4</sub> NiO <sub>4</sub> P <sub>3</sub> |
| Temp             | 100 K                                                                            | 100 K                                                                                                           | 100 K                                                                                                            | 100 K                                                                            |
| Crystal system   | Monoclinic                                                                       | Monoclinic                                                                                                      | Triclinic                                                                                                        | Monoclinic                                                                       |
| Space group      | P2 <sub>1</sub> /c                                                               | P2 <sub>1</sub>                                                                                                 | P-1                                                                                                              | P2 <sub>1</sub> /n                                                               |
| a/ Å             | 21.9928(5)                                                                       | 17.4356(2)                                                                                                      | 13.3950(1)                                                                                                       | 19.6897(2)                                                                       |
| b/ Å             | 17.5090(4)                                                                       | 48.5980(6)                                                                                                      | 15.9482(2)                                                                                                       | 18.2605(2)                                                                       |
| c/ Å             | 17.8697(4)                                                                       | 20.8299(2)                                                                                                      | 23.2712(3)                                                                                                       | 40.6637(4)                                                                       |

|                                           |           |            |            |            |
|-------------------------------------------|-----------|------------|------------|------------|
| $\alpha/^\circ$                           | 90        | 90         | 103.697(1) | 90         |
| $\beta/^\circ$                            | 96.555(2) | 90.369 (1) | 97.850(1)  | 100.044(1) |
| $\gamma/^\circ$                           | 90        | 90         | 90.485(1)  | 90         |
| $V/\text{\AA}^3$                          | 6836.1(3) | 17649.5(3) | 4780.4(1)  | 14396.3(3) |
| Z                                         | 4         | 4          | 2          | 8          |
| $D_{\text{calc}}/\text{g cm}^{-3}$        | 1.191     | 1.224      | 1.235      | 1.086      |
| $\mu(\text{Mo-K}\alpha) / \text{mm}^{-1}$ | 1.548     | 1.658      | 2.015      | 1.469      |
| F(000)                                    | 2548      | 6860       | 1892       | 5064       |
| Reflection collected                      | 12180     | 93407      | 68604      | 170067     |
| Independent reflections                   | 9918      | 54808      | 39743      | 47860      |
| R(int)                                    | 11.41%    | 3.90%      | 3.23%      | 5.64%      |
| R1 (I > 2 $\sigma$ (I)) <sup>a</sup>      | 6.72%     | 6.23%      | 3.78%      | 7.49%      |
| wR2(all)                                  | 18.14%    | 14.96%     | 10.03%     | 16.07%     |
| GOF                                       | 1.029     | 1.071      | 1.044      | 1.095      |



**Table S4-2: Primary Coordination Sphere Bond Angles**

|              | <b>1</b>                   | <b>2-(PPh<sub>3</sub>)<sub>2</sub></b> | <b>*2-(dppm)<sub>2</sub></b>                             | <b>2-(PMe<sub>3</sub>)<sub>2</sub></b> | <b>3</b>                     |
|--------------|----------------------------|----------------------------------------|----------------------------------------------------------|----------------------------------------|------------------------------|
| P(1)-Ni-P(2) | 117.75(2) °                | 111.27(5) °                            | 112.94(8) °<br>112.49(9) °<br>112.39(9) °<br>112.65(9) ° | 107.48(3) °<br>112.19(2) °             | 109.75(4) °<br>109.03(4) °   |
| P(1)-Ni-P(3) | -                          | 107.84(5) °                            | 110.51(8) °<br>110.48(9) °<br>110.67(9) °<br>110.03(9) ° | 113.83(2) °<br>109.51(2) °             | 109.59(4) °<br>110.45(4) °   |
| P(2)-Ni-P(3) | -                          | 113.68(6) °                            | 112.84(8) °<br>112.35(9) °<br>113.12(9) °<br>113.08(9) ° | 113.70(3) °<br>113.40(2) °             | 114.27(4) °<br>114.11(4) °   |
| H-Ni-P(1)    | 112.5(10) °<br>115.4(10) ° | 115.1(15) °                            | 115(5) °<br>120(5) °                                     | 120.9(10) °<br>119.8(12) °             | 129.4(14) °<br>124.0(14) °   |
| H-Ni-P(2)    | 95.2(10) °<br>113.4(10) °  | 105.9(15)                              | 105(5) °<br>102(5) °                                     | 101.0(10) °<br>102.2(12) °             | 96.9(15) °<br>100.0(14) °    |
| H-Ni-P(3)    | -                          | 102.2(17) °                            | 99(5) °<br>98(5) °                                       | 99.2(10) °<br>99.1(12) °               | 96.3(13) °<br>98.9(15) °     |
| Al-H-Ni      | 94.781°<br>97.327°         | 95.679°                                | 90.651°<br>99.269°                                       | 86.142°<br>85.082°                     | 96.480°<br>98.423°           |
| N(1)-Al-N(2) | 100.77(8) °<br>100.74(8) ° | 109.90(17) °                           | 109.0(3) °<br>108.9(3) °<br>108.8(3) °<br>108.6(3) °     | 107.94(9) °<br>110.16(8) °             | 107.52(12) °<br>107.30(12) ° |
| N(1)-Al-O(1) | 77.82(7) °<br>76.14(8) °   | 83.73(16) °                            | 83.8(3) °<br>83.9(3) °<br>83.0(3) °<br>83.3(3) °         | 82.59(7) °<br>82.39(7) °               | 87.92(12) °<br>88.08(12) °   |
| N(2)-Al-O(1) | 103.75(8) °<br>100.66(8) ° | 99.62(16) °                            | 103.3(3) °<br>101.5(3) °<br>102.3(3) °<br>102.6(3) °     | 102.09(8) °<br>100.66(7) °             | 103.78(12) °<br>103.30(12) ° |

|              |                            |             |                      |                           |                           |
|--------------|----------------------------|-------------|----------------------|---------------------------|---------------------------|
| N(1)-Al-O(2) | 155.91(8) °<br>157.76(8) ° | -           | -                    | -                         | -                         |
| N(2)-Al-O(2) | 79.78(8) °<br>77.59(7) °   | -           | -                    | -                         | -                         |
| O(1)-Al-O(2) | 79.66(8) °<br>78.89(7) °   | -           | -                    | -                         | -                         |
| H-Al-N(1)    | 106.6(10) °<br>108.1(10) ° | 128.7(16) ° | 131(5) °<br>135(4) ° | 138.0(9) °<br>136.7(12) ° | 126.7(9) °<br>129.2(11) ° |
| H-Al-N(2)    | 143.2(10) °<br>143.1(10) ° | 120.7(16) ° | 118(5) °<br>115(4) ° | 113.9(9) °<br>113.1(12) ° | 116.3(9) °<br>115.8(11) ° |
| H-Al-O(1)    | 105.0(10) °<br>107.4(10) ° | 95.4(15) °  | 96(5) °<br>97(4) °   | 92.5(9) °<br>92.7(12)     | 108.4(9) °<br>106.0(11) ° |
| H-Al-O(2)    | 86.9(10) °<br>84.7(10) °   | -           | -                    | -                         | -                         |

\* Hydrides were located in only 2 of 4 of the molecules in the asymmetric unit.

## S5: IR Spectroscopy

Figure S5-1: FT-IR spectrum of **1**

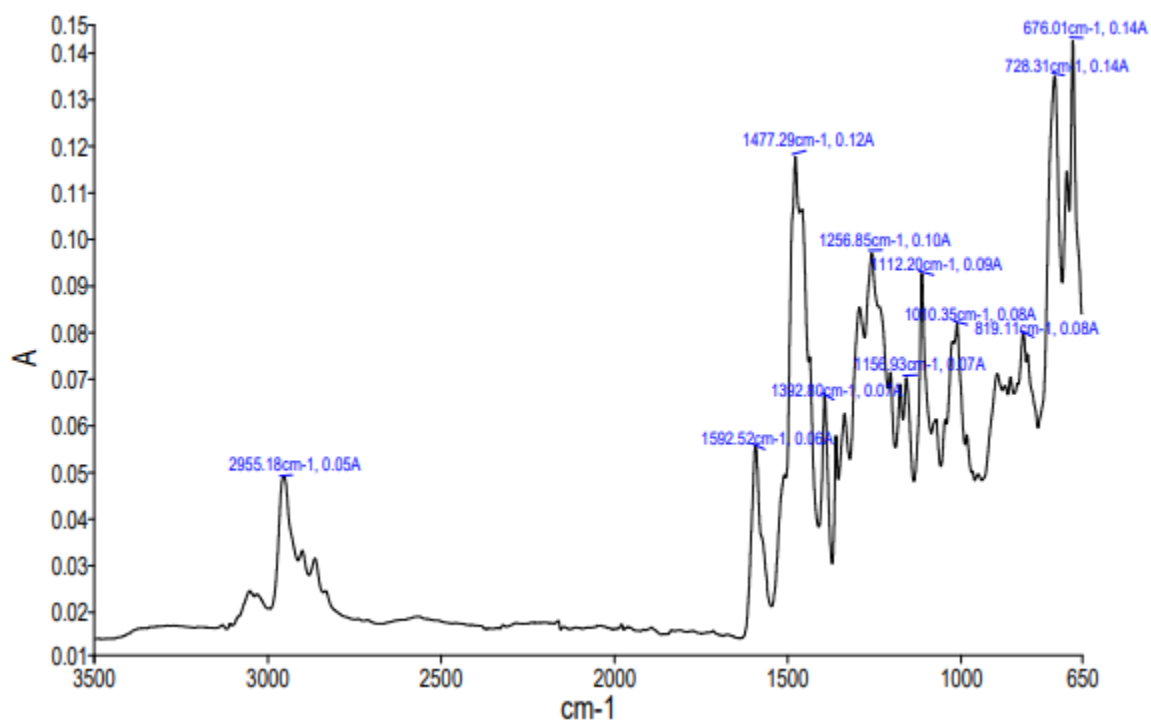

Figure S5-2: FT-IR spectrum of **2-(PPh<sub>3</sub>)<sub>2</sub>**

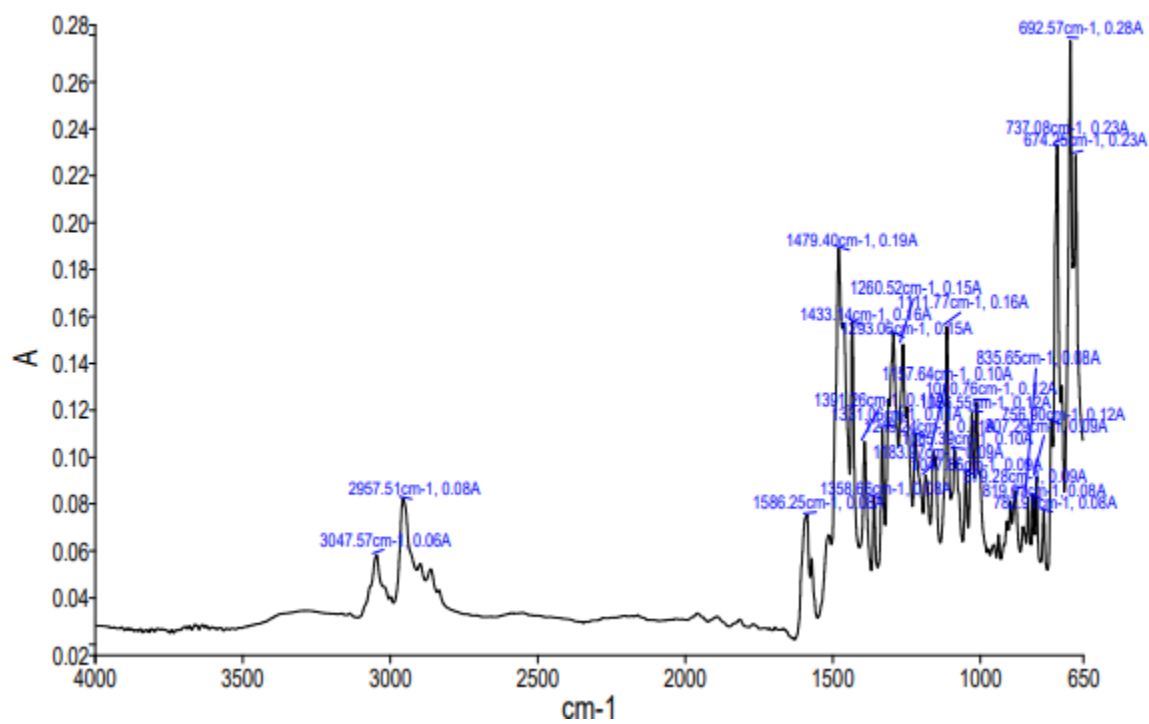

Figure S5-3: FT-IR spectrum of **2-(dppm)<sub>2</sub>**

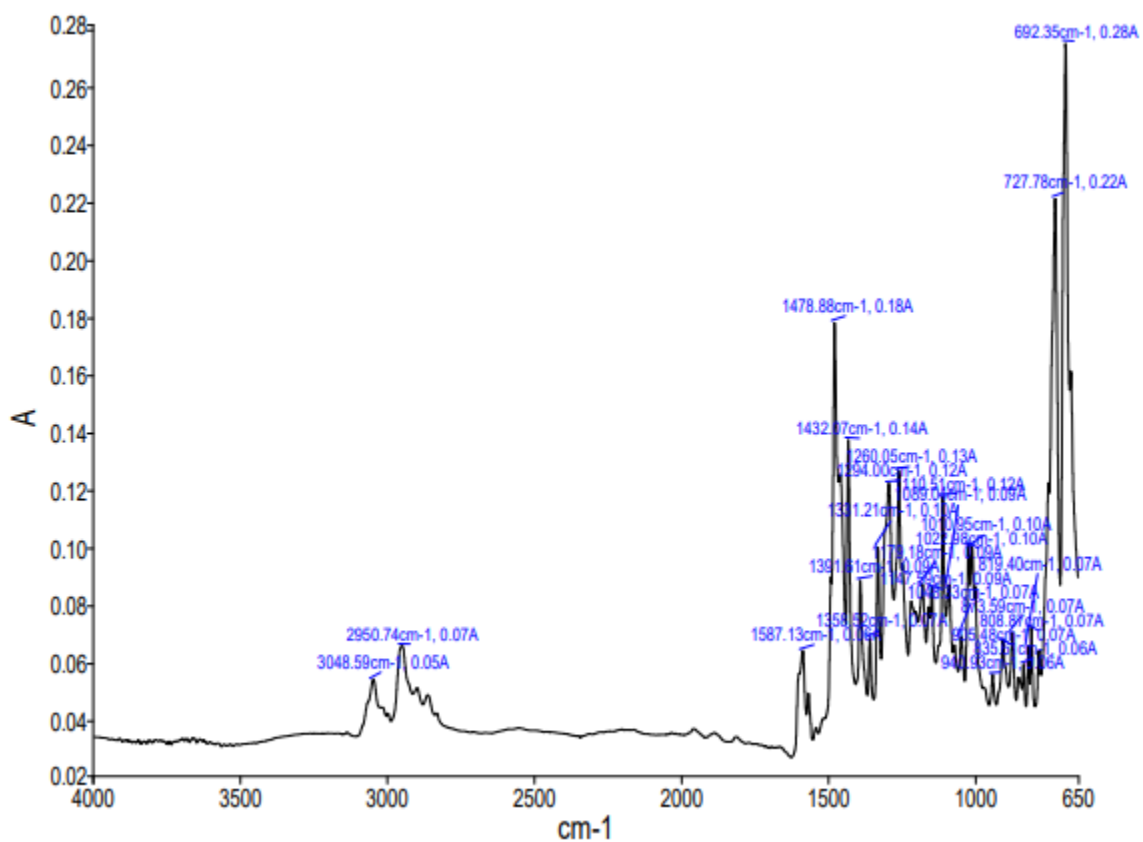

Figure S5-4: FT-IR spectrum of **2-(PMe<sub>3</sub>)<sub>2</sub>**

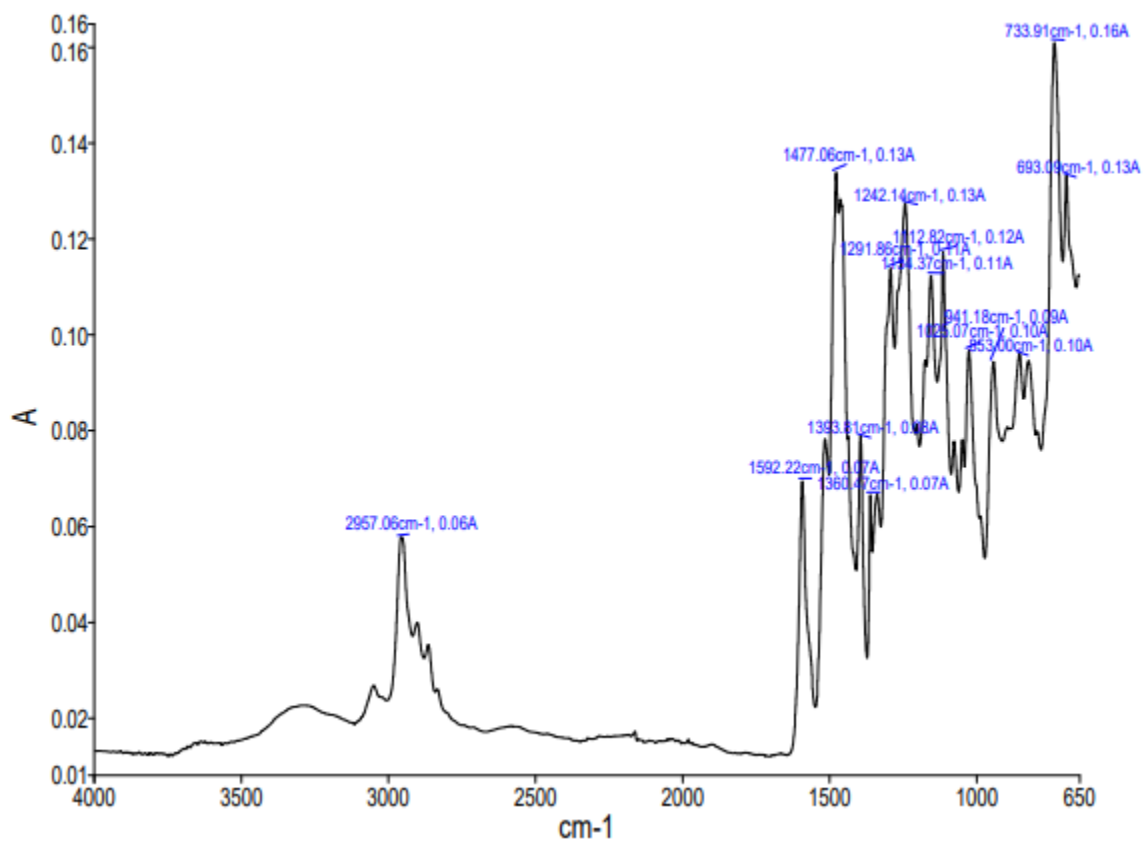

Figure S5-5: FT-IR spectrum of **3**

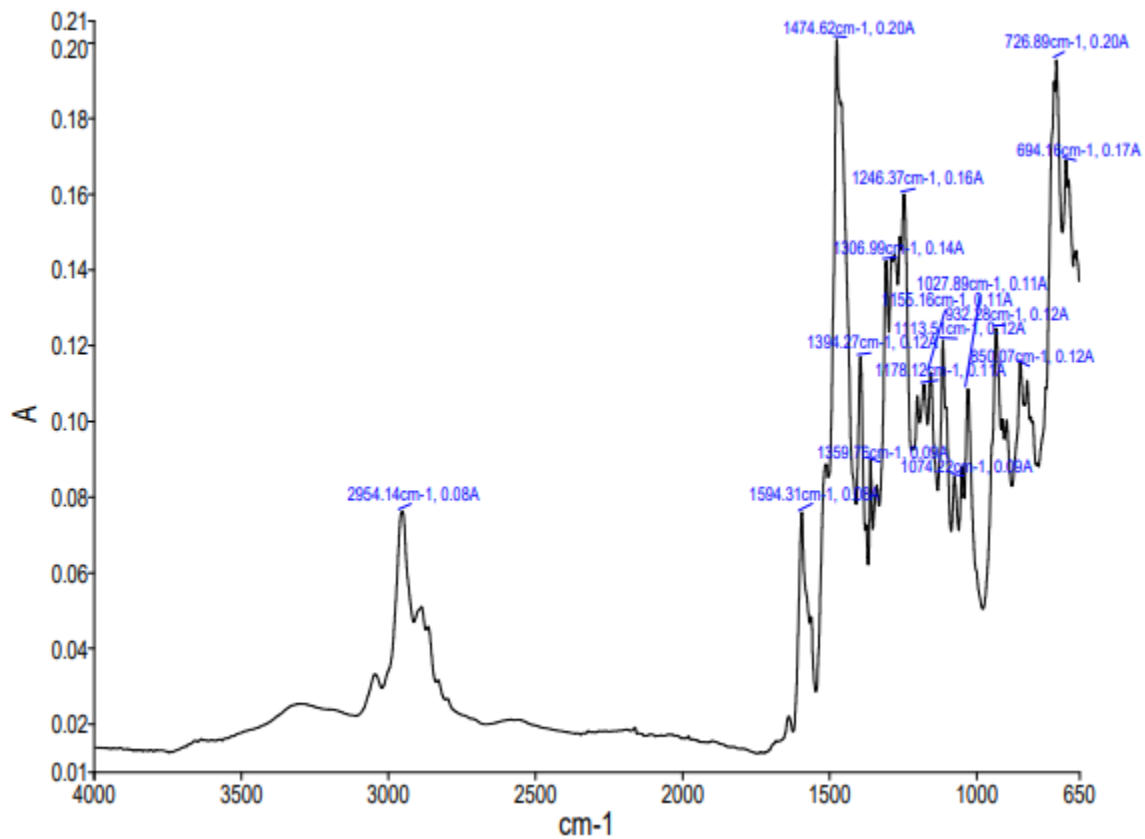

Table S5-1: DFT Calculated IR Stretches for Metal-Hydrides

| Complex                                | $\nu_{\text{M-H}}$ ( $\text{cm}^{-1}$ ) |
|----------------------------------------|-----------------------------------------|
| <b>1</b>                               | 1478, 1508                              |
| <b>2-(PPh<sub>3</sub>)<sub>2</sub></b> | 1489, 1491                              |
| <b>2-(dppm)<sub>2</sub></b>            | 1455, 1457                              |
| <b>2-(PMe<sub>3</sub>)<sub>2</sub></b> | 1432                                    |
| <b>3</b>                               | 1461, 1469, 1475, 1483                  |



## References

- 1) CrysAlisPro 1.171.40.63a (Rigaku Oxford Diffraction, 2019)
- 2) [SCALE3 ABSPACK -An Oxford Diffraction program(1.0.4,gui:1.0.3) (C) 2005 Oxford Diffraction Ltd.
- 3) G. M. Sheldrick, Acta Cryst. 2015, A71, 3.
- 4) O. V. Dolomanov, L. J. Bourhis, R. J. Gildea, J. A. K. Howard, H. Puschmann, J. Appl. Cryst. 2009, 42, 339.
- 5) G. M. Sheldrick, Acta Cryst. 2008, A64, 112
